# Supplementary material
Source: Research Square preprint supplement (doi:10.21203/rs.3.rs-8893138/v1)
Supplement: Supplementary file 1 [file 4f790c92539038d3a5678588.docx]

**SUPPLEMENTARY FILE 3**

**Phase 3 Interview Protocol and Qualitative Codebook**

**Study:** Balancing Flexibility and Foresight: A Dynamic Capabilities Framework for Ambidextrous Strategic Innovation

**Journal:** Humanities and Social Sciences Communications

**Note:** *Fully anonymized for blind peer review. Participant names, organizational affiliations, and all identifying details have been removed. Executive quotes in Part Care paraphrased to prevent identification of individuals or organizations. This document should be read alongside the main manuscript (Sections 3.4 and 4.4).*

**Contents:** Part A Participant Information & Consent Procedure • Part B Semi-Structured Interview Protocol (Full Script) • Part C NVivo 12 Codebook • Part D Thematic Analysis Framework • Part E Member-Checking Procedure & Records

**PART A: PARTICIPANT INFORMATION AND CONSENT PROCEDURE**

**A.1 Sampling Strategy and Participant Selection**

Forty-five C-suite executives were purposively sampled from the three strategic archetypes identified in Phase 2 (Precision Adapters, Visionary Stewards, and Ambidextrous Innovators), ensuring 15 participants per archetype. Theoretical saturation was a guiding criterion: sampling continued within each archetype until no new themes were emerging across successive interviews. Participants were drawn from the three industry sectors studied in Phases 1 and 2 (Technology, Manufacturing, and Retail), with five participants per sector per archetype, ensuring balanced sector and archetype representation.

Eligible participants held C-suite or equivalent senior leadership roles with direct responsibility for strategic innovation decisions. Candidates were identified through (a) professional networks of the research team, (b) industry association contacts, and (c) purposive referrals from earlier Phase 2 survey respondents who had indicated willingness to be contacted for follow-up. A snowball element was used within archetypes to reach the target of 15 per group. Participants were contacted individually by email with a formal invitation letter (available on request), a Participant Information Sheet (PIS), and a consent form.

**A.2 Participant Consent Procedure**

| *Consent procedure: Written informed consent was obtained from all 45 participants prior to any interview activity. The consent process involved three stages: (1) Distribution of the Participant Information Sheet by email at least 7 days before the scheduled interview, allowing participants adequate time to review the study purpose, procedures, data handling, confidentiality protections, and their right to withdraw at any time without consequence. (2) Completion and return of a signed consent form before the interview commenced. Forms were returned electronically via secure encrypted email or signed digitally via DocuSign. (3) Verbal re-confirmation of consent at the opening of each interview session, recorded in the interview transcript header. Consent was obtained between April 2024 and September 2024. No data were collected from any participant who had not completed all three stages.* |
| --- |

**A.3 Anonymized Participant Summary**

| **Archetype** | **Technology** | **Manufacturing** | **Retail** | **Total (n)** | **Role Distribution** |
| --- | --- | --- | --- | --- | --- |
| **Precision Adapters** | 5 | 5 | 5 | **15** | 5 CEOs, 3 COOs, 4 CINOs, 2 CFOs, 1 Other |
| **Visionary Stewards** | 5 | 5 | 5 | **15** | 5 CEOs, 3 COOs, 4 CINOs, 2 CFOs, 1 Other |
| **Ambidextrous Innovators** | 5 | 5 | 5 | **15** | 5 CEOs, 3 COOs, 4 CINOs, 2 CFOs, 1 Other |
| **TOTAL** | **15** | **15** | **15** | **45** | **15 CEOs, 9 COOs, 12 CINOs, 6 CFOs, 3 Other** |

*Note: Average tenure in current role: Precision Adapters 4.6 years; Visionary Stewards 7.8 years; Ambidextrous Innovators 6.7 years. Gender: 37 male / 8 female across total sample. All participants held VP-level or above roles with strategic innovation responsibility.*

**PART B: SEMI-STRUCTURED INTERVIEW PROTOCOL (FULL SCRIPT)**

| *Format and logistics: Interviews were conducted individually, either in person at the participant's place of work or via secure video conference (Zoom or Microsoft Teams), based on participant preference and geographic logistics. Duration: 60–90 minutes. All interviews were audio-recorded with explicit participant consent and professionally transcribed verbatim. Transcripts were returned to participants for review and correction within 7 days of each interview (see Part E: Member Checking). Language: All interviews were conducted in English. The protocol below is the full standardized guide used across all 45 interviews. Interviewers were instructed to follow the script closely while remaining responsive to emergent themes; departure from the script order was permitted but all core questions were required to be addressed in every interview.* |
| --- |

**B.1 Opening Procedure (5 minutes)**

**Interviewer preamble (read verbatim to participant):**

| *Thank you very much for agreeing to participate in this study. Before we begin, I want to briefly confirm a few points. This interview is part of a multi-phase academic research project examining how senior leaders balance strategic agility the ability to respond rapidly to change with long-term strategic direction and vision. There are no right or wrong answers; we are interested in your genuine experience and perspective. The interview will last approximately 60 to 90 minutes. With your permission, I will audio-record the session so that I can transcribe it accurately. The recording will not be shared with anyone outside the research team and will be deleted after transcription. All information you share will be treated as strictly confidential. You will not be identified by name or organization in any publications arising from this research. You may decline to answer any question at any time and you may withdraw from the study at any point without consequence. Do you have any questions before we begin? Are you still happy to proceed?* |
| --- |

**B.2 Warm-up and Context Setting (5-8 minutes)**

| **WU-1 Could you briefly describe your current role and your primary responsibilities in relation to your organization's strategic innovation activities?** |
| --- |
| **Probes / Follow-up prompts:**   - *What does 'strategic innovation' mean in the context of your organization?* - *How long have you been in this role, and how has the strategic environment changed during your tenure?* |

| **WU-2 How would you characterize the competitive environment your organization currently operates in — in terms of how fast-moving, complex, or unpredictable it is?** |
| --- |
| **Probes / Follow-up prompts:**   - *What are the two or three most significant sources of environmental turbulence or uncertainty for your organization right now?* - *Has this changed significantly over the past five years?* |

**B.3 Core Theme 1: Configuring Strategic Agility and Long-term Vision (20–25 minutes)**

*Interviewer note: This section explores RQ1 how organizations configure agility and vision. Begin with the broad framing question, then use probes to move toward specific practices and tensions.*

| **CT1-1 In your experience, how does your organization balance the need to respond quickly to change with the need to maintain a consistent long-term strategic direction?** |
| --- |
| **Probes / Follow-up prompts:**   - *Can you describe what 'strategic agility' means in practice in your organization what does it look like on a day-to-day basis?* - *And how would you describe your organization's approach to long-term strategic direction how is it articulated, maintained, and communicated?* - *Do you see these two orientations as complementary, in tension, or something else?* |

| **CT1-2 Can you describe a specific strategic decision or initiative in the past two to three years in which your organization had to actively manage both the need for speed and the need for strategic consistency simultaneously?** |
| --- |
| **Probes / Follow-up prompts:**   - *What was the strategic challenge or opportunity you were responding to?* - *How did you navigate the tension between responding quickly and staying true to your long-term direction?* - *What was the outcome, and what did you learn from the experience?* - *If you were to face a similar situation again, what would you do differently?* |

| **CT1-3 Some organizations seem to prioritize one of these orientations over the other — either being highly agile but less strategically consistent, or being very focused on long-term direction but slower to respond. How would you characterize your own organization's approach?** |
| --- |
| **Probes / Follow-up prompts:**   - *Does your organization's approach change depending on the environment for example, in more volatile versus more stable periods?* - *How do you decide when to prioritize speed and responsiveness versus when to hold firm on long-term commitments?* |

**B.4 Core Theme 2: Integration Mechanisms (15–20 minutes)**

*Interviewer note: This section explores RQ2 the mechanisms enabling integration of agility and vision. Focus on specific, observable practices rather than general descriptions.*

| **CT2-1 What specific organizational practices, processes, or structures do you believe are most important in enabling your organization to be both agile and strategically coherent at the same time?** |
| --- |
| **Probes / Follow-up prompts:**   - *Can you give me a concrete example of a process or practice that helps your organization manage this balance?* - *How long has this been in place, and how did it come about?* - *Has it evolved over time? If so, how and why?* |

| **CT2-2 How do senior leaders in your organization communicate with employees about the need to both adapt to change and maintain a clear strategic direction? Is there ever a risk of sending mixed messages?** |
| --- |
| **Probes / Follow-up prompts:**   - *How do you personally manage this as a leader how do you hold both orientations at the same time?* - *How do you respond when team members push back or express confusion about seemingly contradictory strategic expectations?* - *What does 'paradoxical leadership' the ability to hold and work with contradictions look like in practice in your organization?* |
| **CT2-3 How does your organization allocate resources financial, human, and operational across short-term adaptive activities and longer-term strategic investments? Is there an explicit process or framework for this?** |
| **Probes / Follow-up prompts:**   - *How frequently do you review and rebalance this allocation?* - *Who is responsible for making rebalancing decisions, and at what organizational level?* - *What happens when short-term pressures threaten to crowd out longer-term investments how do you manage that?* |

| **CT2-4 To what extent do employees below the senior leadership level have the authority and capability to make real-time judgments about when to adapt versus when to hold firm on strategic direction?** |
| --- |
| **Probes / Follow-up prompts:**   - *How do you build this kind of situational judgment in your people?* - *What structures or cultural norms support or constrain this kind of autonomous decision-making?* |

**B.5 Core Theme 3: Environmental Contingencies (10-12 minutes)**

*Interviewer note: This section explores RQ3 how environmental conditions moderate capability configurations.*

| **CT3-1 How does the nature of your competitive environment its volatility, complexity, or unpredictability influence the balance you strike between agility and long-term vision?** |
| --- |
| **Probes / Follow-up prompts:**   - *Has there been a period in recent years when you felt you needed to shift the emphasis significantly either becoming more agile or recommitting to long-term direction? What triggered that shift?* - *Looking ahead, do you anticipate the balance between these two orientations changing in your organization over the next three to five years? Why?* |

| **CT3-2 Some research suggests that in highly volatile environments, agility becomes more important, while in highly complex environments, long-term vision becomes more critical. Does this match your experience?** |
| --- |
| **Probes / Follow-up prompts:**   - *Can you describe a situation where environmental volatility made agility particularly valuable for your organization?* - *And a situation where complexity made long-term vision particularly important?* - *Is there ever a situation where you feel you need both maximum agility and maximum vision simultaneously?* |

**B.6 Critical Incident Exploration (8-10 minutes)**

*Interviewer note: Use this section to surface rich narrative data about specific capability deployment events. Choose one or two of the following depending on what has emerged earlier in the interview.*

| **CI-1 Thinking about a moment of significant organizational transformation or disruption a major market shift, a competitive threat, or an internal crisis how did your organization's balance of agility and strategic direction either help or hinder your response?** |
| --- |
| **Probes / Follow-up prompts:**   - *What specific capabilities were most valuable in that situation?* - *Were there capability gaps that made the response more difficult?* - *What did you personally learn about your organization's strategic capabilities from that experience?* |

| **CI-2 Have there been situations where being too agile pivoting too frequently or too fast actually damaged your organization's strategic coherence or performance? And situations where being too committed to long-term direction made it harder to respond to an important change?** |
| --- |
| **Probes / Follow-up prompts:**   - *What were the warning signs that you had gone too far in one direction?* - *How did you course-correct, and how quickly?* - *What organizational mechanisms, if any, helped you detect and respond to this imbalance?* |

**B.7 Implementation Challenges (5–8 minutes)**

| **IC-1 What do you see as the most significant organizational challenges in building and maintaining both strategic agility and long-term vision simultaneously as capabilities that coexist rather than trade off against each other?** |
| --- |
| **Probes / Follow-up prompts:**   - *Where does the organizational resistance to this dual orientation tend to come from is it structural, cultural, resource-based, or something else?* - *What advice would you give to a peer executive who wants to build this kind of dual capability in their organization?* - *If you could change one thing about how your organization currently manages this balance, what would it be?* |

**B.8 closing (3-5 minutes)**

**Interviewer closing (read verbatim):**

| *We are coming to the end of our interview. Before we close, I have two final questions. First, is there anything else you would like to add any aspect of how your organization manages the balance between agility and long-term vision that we have not covered, or any further reflections you would like to share? [Allow time for response.] Second, we will be conducting a member-checking process in which we will send you a summary of the key themes and anonymized excerpts attributed to your interview within approximately three to four weeks of today. Would you be willing to review that summary and provide brief feedback on its accuracy and fairness? [Confirm and note response.] Thank you very much for your time and your thoughtful contributions to this research. Your participation is genuinely valuable. We will send you a copy of the final published paper once it is available.* |
| --- |

**PART C: NVIVO 12 CODEBOOK**

**C.1 Coding Approach and Structure**

All 45 interview transcripts were imported into NVivo 12 (QSR International) as individual text sources. Analysis employed a hybrid deductive-inductive approach. Deductive codes were derived a priori from the study's theoretical framework and research questions (strategic agility, sustained vision, integration mechanisms, environmental conditions, innovation outcomes). Inductive codes emerged iteratively during coding of the first 15 transcripts and were progressively refined. The codebook was finalized after the 30th transcript, with no new first-level codes emerging during analysis of transcripts 31-45, indicating theoretical saturation.

Two coders independently coded all transcripts (same raters as Phase 1 content analysis). Coding discrepancies were reviewed in weekly reconciliation sessions. The codebook below represents the final agreed version following these sessions. Frequency counts reflect the total number of transcripts in which each code was applied at least once (out of n = 45). Parent themes are colour-coded to match the manuscript's theoretical framework.

| *Code hierarchy: The codebook uses a three-level hierarchy: (1) Parent Theme the major theoretical construct; (2) Core Node primary code category within the theme; (3) Sub-node refined code for specific mechanisms, sub-processes, or nuances. In NVivo 12, this corresponds to a parent node / child node / grandchild node structure. Frequency counts are reported at the core node level. Code types: D = Deductive (theory-driven); I = Inductive (data-driven); D/I = Hybrid (deductively framed, inductively refined).* |
| --- |

**C.2 Full Codebook**

**Theme 1: Strategic Agility (SA) | Colour: Amber**

| **Node Code** | **Parent Theme** | **Code Type** | **Definition** | **Example Excerpt (paraphrased)** | **Freq (n=45)** |
| --- | --- | --- | --- | --- | --- |
| **SA\Sens** | Strategic Agility | D | All references to environmental sensing: monitoring, scanning, weak-signal detection, competitive intelligence gathering, and market awareness practices. | Executive describes weekly environmental scanning sessions and use of external advisory panels to surface emerging signals before they become trends. | 43 / 45 |
| **SA\Sens\WeakSig** | SA\Sensing | D/I | Specific references to detecting early-stage, ambiguous or low-amplitude signals of strategic change before they become mainstream. | 'We have people whose only job is to look for things that might not matter yet that's where the real agility advantage comes from.' | 31 / 45 |
| **SA\Sens\ExtIntel** | SA\Sensing | D | Use of external data sources, advisors, networks, or partnerships to enhance environmental intelligence. | CEO references to industry consortia and cross-sector advisory boards as real-time intelligence inputs to strategic review. | 38 / 45 |
| **SA\Pivot** | Strategic Agility | D | References to capability for strategic pivots: willingness and capacity to fundamentally change direction in response to environmental signals. | COO describes full business model pivot in 2022 executed within 90 days, enabled by pre-positioned resource reserves. | 39 / 45 |
| **SA\Pivot\Speed** | SA\Pivoting | D/I | Emphasis on the speed dimension of pivoting: how rapidly the organization can decide and execute major strategic shifts. | 'Speed is the currency. If it takes us six months to decide to pivot, the window has closed.' | 35 / 45 |
| **SA\Pivot\Cost** | SA\Pivoting | I | Discussion of the organizational costs or risks of pivoting: morale impact, capability loss, stakeholder confusion. | Executive reflects on how frequent pivots have eroded employee trust and made long-term capability development difficult. | 24 / 45 |
| **SA\ResFluid** | Strategic Agility | D | References to rapid, flexible reallocation of financial, human, and operational resources across strategic priorities. | CFO describes quarterly rolling budget model that allows up to 30% of investment budget to be reallocated mid-cycle. | 41 / 45 |
| **SA\ResFluid\Budget** | SA\ResourceFluidity | D | Specific references to budgeting mechanisms and financial processes that enable agile resource reallocation. | References to zero-based budgeting, rolling forecasts, and pre-approved contingency reserves enabling fast deployment. | 36 / 45 |
| **SA\ResFluid\Talent** | SA\ResourceFluidity | I | References to talent mobility, workforce flexibility, and human capital redeployment as components of resource fluidity. | 'The most important resource we move quickly is people the right people on the right challenge in 48 hours.' | 33 / 45 |
| **SA\LdrUnity** | Strategic Agility | D | References to collective alignment, shared commitment, and fast consensus among the top management team as enablers of agile decision-making. | CEO describes structured weekly top-team alignment ritual that enables rapid, unified strategic decisions without lengthy deliberation. | 40 / 45 |
| **SA\DecSpeed** | Strategic Agility | D/I | References to decision-making velocity: how fast the organization moves from signal to decision to action. | 'Competitors are operating on quarterly strategy cycles. We operate on weeks. That gap is our edge.' | 38 / 45 |

**Theme 2: Sustained Strategic Direction / Vision (SV) | Colour: Green**

| **Node Code** | **Parent Theme** | **Code Type** | **Definition** | **Example Excerpt (paraphrased)** | **Freq (*n* =45)** |
| --- | --- | --- | --- | --- | --- |
| **SV\Intent** | Sustained Vision | D | References to the clarity, consistency, and communication of long-term strategic intent across the organization and over time. | CEO describes 10-year strategic narrative that has remained substantially unchanged through three economic cycles and one leadership transition. | 44 / 45 |
| **SV\Intent\Artic** | SV\Intent | D | Specific references to how long-term vision is articulated: language, metaphors, documents, rituals, or symbolic practices. | 'Our vision is simple enough that anyone in the organization can recite it in one sentence. That's intentional.' | 39 / 45 |
| **SV\Intent\Cascade** | SV\Intent | D/I | How the long-term strategic vision is cascaded through the organization and translated into actionable objectives at different levels. | References to strategic cascading workshops, OKR frameworks aligned to vision, and line-manager briefing protocols. | 35 / 45 |
| **SV\Endure** | Sustained Vision | D | References to the temporal endurance of strategic commitments: maintaining direction through short-term performance pressures, market disruption, or leadership changes. | COO describes protecting a 7-year R&D programme from two successive cost-cutting exercises by demonstrating its long-term value to the board. | 42 / 45 |
| **SV\Endure\BrdPres** | SV\Endurance | I | References to the specific role of the board of directors in protecting long-term strategic commitments from short-term pressure. | 'The board is our firewall against short-termism. They hold us accountable to the 10-year horizon when quarterly pressure mounts.' | 28 / 45 |
| **SV\Endure\InvComm** | SV\Endurance | I | References to investor and stakeholder communication as a mechanism for sustaining long-term strategic commitments. | CEO references to multi-year earnings guidance as a commitment mechanism that disciplines internal strategy against short-termism. | 31 / 45 |
| **SV\CapPres** | Sustained Vision | D | References to deliberate protection of core organizational capabilities and competencies during transformation, restructuring, or M&A. | CINO describes explicit 'capability ring-fencing' protocol applied during recent restructuring to protect core engineering competencies. | 40 / 45 |
| **SV\CapPres\Talent** | SV\CapabilityPres. | I | Specific references to protecting key talent as a core element of capability preservation. | 'We ring-fenced our top 200 engineers from the restructuring. Losing them would have cost us a decade of technical advantage.' | 37 / 45 |
| **SV\CapPres\IP** | SV\CapabilityPres. | I | References to protecting intellectual property, technology platforms, and knowledge assets during organizational change. | References to IP transfer restrictions, knowledge management protocols, and strategic asset registers as preservation mechanisms. | 29 / 45 |
| **SV\Consist** | Sustained Vision | D | References to strategic consistency: maintaining core strategic priorities across leadership transitions, crises, and competitive disruptions. | Multiple references to strategy remaining 'fundamentally unchanged' through CEO succession and a major competitive market entry. | 41 / 45 |

**Theme 3: Integration Mechanisms (IM) | Colour: Blue**

| **Node Code** | **Parent Theme** | **Code Type** | **Definition** | **Example Excerpt (paraphrased)** | **Freq (*n*=45)** |
| --- | --- | --- | --- | --- | --- |
| **IM\PL** | Integration Mechs. | D | All references to paradoxical leadership: behaviours, orientations, and practices in which leaders legitimize, hold, and work productively with strategic contradictions. | CEO describes explicitly framing agility-vision tension to the board as productive rather than problematic, and modelling comfort with ambiguity. | 41 / 45 |
| **IM\PL\BothAnd** | IM\Paradox. Ldship | D/I | Specific references to 'both/and' thinking: framing strategic choices as complementary rather than competing, at leadership and organizational levels. | 'I banned the word 'or' from our strategy meetings. Every tension is a 'both/and' until proven otherwise.' | 38 / 45 |
| **IM\PL\LegitTens** | IM\Paradox. Ldship | D | References to legitimizing strategic tensions: treating contradictions as sources of insight rather than problems to eliminate. | CEO describes weekly 'tension harvest' meeting where paradoxes are named, explored, and used to inform strategic decisions. | 35 / 45 |
| **IM\PL\BehavComp** | IM\Paradox. Ldship | D/I | References to behavioral complexity in leadership: leaders' capacity to shift between visionary and operational styles fluidly based on situational demands. | 'On Monday I'm the long-term visionary. On Thursday I'm the operator removing obstacles. My team needs both and knows I can do both.' | 32 / 45 |
| **IM\PL\EmotToll** | IM\Paradox. Ldship | I | Emergent code: references to the personal and emotional demands of sustaining paradoxical leadership orientation over time. | 'Holding two contradictory truths simultaneously, every day, for years — it's genuinely exhausting. Nobody warns you about that.' | 19 / 45 |
| **IM\CA** | Integration Mechs. | D | All references to contextual ambidexterity: organizational mechanisms enabling individuals and teams to exercise context-appropriate agility-vision judgments without structural separation. | CINO describes 'bounded autonomy' framework where teams have full operational freedom within non-negotiable strategic constraints. | 43 / 45 |
| **IM\CA\BndAuto** | IM\Contextual Ambid. | D | Specific references to bounded autonomy: explicit frameworks defining the scope of team autonomy within fixed strategic parameters. | 'Teams own the how completely. The what and why are set centrally and non-negotiable. That's the deal.' | 40 / 45 |
| **IM\CA\DualMetric** | IM\Contextual Ambid. | D/I | References to dual performance metrics holding individuals and teams accountable for both agility-related and vision-related outcomes. | References to scorecards tracking both innovation velocity and strategic alignment contribution as joint performance criteria. | 37 / 45 |
| **IM\CA\Culture** | IM\Contextual Ambid. | I | References to cultural norms, values, and informal practices that reinforce 'both/and' thinking at all organizational levels. | 'We promote people who ask 'and' questions in strategy meetings. After a while the culture just becomes both/and.' | 34 / 45 |
| **IM\CA\SitJudge** | IM\Contextual Ambid. | D/I | References to the development of situational judgment in employees: training, experience-building, and reflection practices that build context-appropriate decision capability. | References to simulation-based training, strategic rotation programmes, and after-action reviews as judgment-building mechanisms. | 28 / 45 |
| **IM\DB** | Integration Mechs. | D | All references to dynamic balancing: processes for continuously sensing and adjusting the relative emphasis on agility versus vision in real time. | CSO describes quarterly 'strategic tension index' review and formal rebalancing trigger protocols. | 39 / 45 |
| **IM\DB\Sensing** | IM\Dynamic Balancing | D/I | Specific references to real-time environmental sensing mechanisms feeding directly into strategic rebalancing decisions. | 'Our executive team spends 90 minutes every week asking one question: what has changed, and does it change the balance?' | 36 / 45 |
| **IM\DB\Portfolio** | IM\Dynamic Balancing | D | References to portfolio management frameworks explicitly balancing short, medium, and long-term strategic investments. | References to horizon-based portfolio logic (70/20/10, or now/next/future), with explicit rebalancing protocols. | 33 / 45 |
| **IM\DB\Oscillation** | IM\Dynamic Balancing | I | References to the acceptance and normalization of periodic emphasis shifts between agility and vision as a natural organizational rhythm rather than a failure. | 'We go through seasons. Sprint seasons and consolidation seasons. We stopped panicking when the emphasis shifts.' | 30 / 45 |
| **IM\DB\TensIndex** | IM\Dynamic Balancing | I | References to formal or semi-formal monitoring instruments tracking the balance between agility and vision over time. | References to 'strategic tension index', 'agility-coherence dashboard', and similar custom tools used to monitor balance. | 24 / 45 |

**Theme 4: Environmental Conditions (EC) | Colour: Orange**

| **Node Code** | **Parent Theme** | **Code Type** | **Definition** | **Example Excerpt (paraphrased)** | **Freq (*n*=45)** |
| --- | --- | --- | --- | --- | --- |
| **EC\Volat** | Environmental Conds. | D | References to environmental volatility: rate, unpredictability, and magnitude of change in competitive, technological, or regulatory conditions. | CEO describes competitive environment as 'genuinely discontinuous' not just fast-moving but characterized by structural breaks. | 42 / 45 |
| **EC\Volat\TechDisr** | EC\Volatility | D/I | Specific references to technology disruption as a source of environmental volatility. | Multiple references to AI, platform shifts, and digitalization as creating discontinuous competitive dynamics requiring rapid strategic response. | 40 / 45 |
| **EC\Volat\GeoPol** | EC\Volatility | I | References to geopolitical events and policy uncertainty as sources of volatility. | Executives reference supply chain disruption, trade tensions, and regulatory volatility as creating new strategic agility demands. | 29 / 45 |
| **EC\Complex** | Environmental Conds. | D | References to environmental complexity: the number and interdependence of factors that must be managed simultaneously. | COO references managing 12 simultaneous regulatory jurisdictions, each with distinct and sometimes conflicting requirements. | 40 / 45 |
| **EC\Complex\Stake** | EC\Complexity | I | Specific references to stakeholder complexity as a dimension of environmental complexity. | References to managing conflicting demands of investors, regulators, employees, communities, and customers simultaneously. | 35 / 45 |
| **EC\Mod\AgVol** | Environmental Conds. | D | References to volatility amplifying the value of agility: high volatility making rapid responsiveness more critical. | 'When everything is changing, speed is survival. The agility premium goes up dramatically in volatile markets.' | 38 / 45 |
| **EC\Mod\ViComp** | Environmental Conds. | D | References to complexity amplifying the value of vision: high complexity making long-term direction more critical as a navigational anchor. | 'When everything is complicated, you need a north star more than ever. Without vision, complexity just becomes noise.' | 36 / 45 |
| **EC\Mod\BothHigh** | Environmental Conds. | D/I | References to situations of jointly high volatility and complexity demanding dual capability peaks simultaneously. | 'The hardest environment is fast AND complex. That's when you need everything — maximum agility and maximum vision at once.' | 31 / 45 |

**Theme 5: Implementation Challenges (IC) | Colour: Red (Inductive)**

| **Node Code** | **Parent Theme** | **Code Type** | **Definition** | **Example Excerpt (paraphrased)** | **Freq (*n*=45)** |
| --- | --- | --- | --- | --- | --- |
| **IC\Res** | Implementation Challenges | I | References to resource competition: difficulty funding both agility infrastructure and long-term strategic investment simultaneously. | CFO describes ongoing internal debate about whether innovation budgets should fund agility platforms or long-term capability bets. | 35 / 45 |
| **IC\Measure** | Implementation Challenges | I | References to measurement challenges: difficulty developing performance systems that track both agility-related and vision-related outcomes meaningfully. | 'Our ERP was built for either/or thinking. Creating dashboards that track both honestly has taken us three years.' | 32 / 45 |
| **IC\LdrDev** | Implementation Challenges | I | References to leadership development gaps: scarcity of leaders capable of sustaining paradoxical leadership orientation. | 'We have great operators and great visionaries. Leaders who are genuinely both are extraordinarily rare.' | 31 / 45 |
| **IC\Culture** | Implementation Challenges | I | References to cultural resistance: employee preference for clarity and resistance to sustained strategic ambiguity. | 'Some of our best people have left because they couldn't handle 'it depends'. That's a real cost we carry.' | 26 / 45 |
| **IC\StkhComm** | Implementation Challenges | I | References to external stakeholder communication challenges: difficulty explaining a dual-orientation strategy to analysts, investors, or media. | 'Analysts want a simple story. Telling them we're simultaneously the most agile and the most consistent company in our sector sounds like we don't know what we are.' | 29 / 45 |
| **IC\Temporal** | Implementation Challenges | I | References to temporal misalignment: difficulty reconciling short-cycle agility rhythms with long-cycle vision commitment rhythms in the same organization. | COO describes 'time wars' between teams operating on sprint cycles and teams managing decade-long capability programmes. | 27 / 45 |

**PART D: THEMATIC ANALYSIS FRAMEWORK**

**D.1 Analysis Procedure**

Thematic analysis followed the six-phase framework of Braun and Clarke (2006), adapted for deductive-inductive hybrid coding in NVivo 12. The analysis proceeded as follows:

| **Phase** | **Activity** | **Description and Output** |
| --- | --- | --- |
| **1** | **Familiarization** | All 45 transcripts read in full twice by both coders before any coding commenced. Memos recorded initial observations, emerging patterns, and theoretically relevant passages. Duration: 3 weeks. |
| **2** | **Initial Code Generation** | Hybrid coding applied: deductive codes from theoretical framework applied first; inductive codes added as data-driven themes emerged. 67 initial codes generated across 45 transcripts. Duration: 6 weeks. |
| **3** | **Searching for Themes** | NVivo 12 matrix coding query used to identify co-occurring codes and map relationships between constructs. Initial theme map drafted. Duration: 2 weeks. |
| **4** | **Reviewing Themes** | Both coders reviewed themes against raw transcript data. Three candidate themes were merged; two were split into sub-themes. Final codebook agreed (see Part C). Duration: 2 weeks. |
| **5** | **Defining and Naming** | Themes formally named and defined with explicit inclusion/exclusion criteria. Theme definitions reviewed against theoretical framework to confirm alignment. Thematic analysis framework finalized (see D.2 below). Duration: 1 week. |
| **6** | **Reporting and Integration** | Thematic findings integrated with quantitative results via sequential explanatory logic. Representative anonymized quotes selected for each theme for manuscript reporting. Member checking conducted (see Part E). Duration: 3 weeks. |

**D.2 Final Thematic Map**

| *The thematic map below represents the final analytic structure used to organize and report qualitative findings. Three primary integrative themes emerged from analysis, each with supporting sub-themes. Deductive codes from the original theoretical framework were confirmed and enriched by inductive codes. Five emergent sub-themes not anticipated in the theoretical framework are marked with (I) below.* |
| --- |

**Primary Theme 1: Paradoxical Leadership as Integration Engine**

- 1.1 Simultaneous messaging: communicating stability and transformation concurrently without contradiction
- 1.2 Legitimizing productive tension: framing contradictions as strategic assets rather than problems (D/I)
- 1.3 Behavioral complexity: leaders fluidly shifting between visionary and operational orientations
- 1.4 Emotional toll of sustained paradox management (I) emergent: the personal cost of holding contradictions

**Primary Theme 2: Contextual Ambidexterity as Organizational Architecture**

- 2.1 Bounded autonomy structures: freedom in how, constraint in what/why
- 2.2 Dual performance accountability: metrics that jointly reward speed and strategic alignment
- 2.3 Both/and cultural norms: informal culture rewarding integrative rather than either/or thinking (I)
- 2.4 Situational judgment development: deliberate capability-building for context-appropriate decision-making

**Primary Theme 3: Dynamic Balancing as Continuous Process**

- 3.1 Real-time sensing mechanisms: institutionalized forums for environmental reading and rebalancing
- 3.2 Portfolio balancing logic: explicit horizon-based resource allocation with rebalancing protocols
- 3.3 Oscillation acceptance: normalizing periodic emphasis shifts rather than treating them as failures (I)
- 3.4 Strategic tension monitoring: formal instruments tracking agility-vision balance over time (I)

**Cross-Cutting Theme: Implementation Challenges**

- 4.1 Resource competition between agility and vision investments
- 4.2 Measurement complexity: developing dual-orientation performance systems
- 4.3 Leadership development scarcity: rarity of paradox-capable senior leaders (I)
- 4.4 Cultural resistance and stakeholder communication complexity

**PART E: MEMBER-CHECKING PROCEDURE AND RECORDS**

**E.1 Procedure**

Member checking was conducted with 15 of the 45 participants (33%) to enhance the credibility and trustworthiness of the qualitative findings, in accordance with established best practice in interpretive qualitative research (Creswell & Miller, 2000; Lincoln & Guba, 1985). Participants were selected purposively to ensure representation across all three archetypes (5 per archetype) and all three industry sectors (5 per sector).

Each selected participant received a member-checking package comprising: (1) an anonymized two-page summary of the key thematic findings attributed to their interview; (2) any direct or paraphrased quotes proposed for use in the manuscript, presented anonymously; and (3) a structured feedback form with five items asking participants to assess accuracy, fairness, completeness, and clarity of the summary, with space for corrections or additions. Participants were given 14 days to respond. All 15 invited participants completed and returned the feedback form within the deadline.

| *Member checking scope: Participants reviewed thematic summaries and proposed quotes only not raw transcript extracts, to protect against potential re-identification risk. No participant requested withdrawal of data. Fourteen of 15 participants confirmed the summary as accurate and fair without modification. One participant (MC-08) requested a minor clarification to the characterization of their organization's resource allocation practice, which was incorporated into the final codebook and manuscript draft.* |
| --- |

**E.2 Member-Checking Record**

| **ID** | **Archetype** | **Method** | **Date** | **Outcome / Corrections** |
| --- | --- | --- | --- | --- |
| **MC-01** | Precision Adapters | Email (secure) | Oct 2024 | Confirmed accurate. No corrections requested. |
| **MC-02** | Precision Adapters | Email (secure) | Oct 2024 | Confirmed accurate. Requested one paraphrased quote be made more generic to reduce identification risk amended. |
| **MC-03** | Precision Adapters | Video call (Zoom) | Oct 2024 | Confirmed accurate. Added one elaboration to sensing mechanism description incorporated. |
| **MC-04** | Precision Adapters | Email (secure) | Oct 2024 | Confirmed accurate. No corrections requested. |
| **MC-05** | Precision Adapters | Email (secure) | Nov 2024 | Confirmed accurate. Suggested stronger emphasis on implementation challenge theme noted in analysis memos. |
| **MC-06** | Visionary Stewards | Email (secure) | Oct 2024 | Confirmed accurate. No corrections requested. |
| **MC-07** | Visionary Stewards | Video call (Teams) | Oct 2024 | Confirmed accurate. Clarified board's role in long-term commitment incorporated into SV\Endure\BrdPres code definition. |
| **MC-08** | Visionary Stewards | Email (secure) | Oct 2024 | Requested correction: resource allocation described as 'annual' should be 'rolling 18-month'. Corrected in codebook and manuscript. |
| **MC-09** | Visionary Stewards | Email (secure) | Nov 2024 | Confirmed accurate. No corrections requested. |
| **MC-10** | Visionary Stewards | Email (secure) | Nov 2024 | Confirmed accurate. Added nuance to capability preservation quote minor rewording incorporated. |
| **MC-11** | Ambidextrous Innovators | Video call (Zoom) | Oct 2024 | Confirmed accurate. Validated paradoxical leadership theme characterization as 'exactly right'. No corrections. |
| **MC-12** | Ambidextrous Innovators | Email (secure) | Oct 2024 | Confirmed accurate. No corrections requested. |
| **MC-13** | Ambidextrous Innovators | Email (secure) | Nov 2024 | Confirmed accurate. Provided additional context on dynamic balancing mechanism — incorporated as supplementary memo. |
| **MC-14** | Ambidextrous Innovators | Email (secure) | Nov 2024 | Confirmed accurate. No corrections requested. |
| **MC-15** | Ambidextrous Innovators | Video call (Teams) | Nov 2024 | Confirmed accurate. Requested one industry-specific reference be generalized further amended. |
| **TOTAL** | **5 PA / 5 VS / 5 AI** | **12 email / 3 video** | **Oct–Nov 2024** | **15/15 responses received (100%). 14/15 confirmed without correction. 1 factual correction incorporated. 3 minor quote amendments. Overall: strong confirmatory result.** |

*References for thematic analysis methodology: Braun, V., & Clarke, V. (2006). Using thematic analysis in psychology. Qualitative Research in Psychology, 3(2), 77-101. Creswell, J.W., & Miller, D.L. (2000). Determining validity in qualitative inquiry. Theory into Practice, 39(3), 124-130. Lincoln, Y.S., & Guba, E.G. (1985). Naturalistic Inquiry. Sage.*

**Document Information:** Supplementary File 3 Interview Protocol & Qualitative Codebook | 45 Participants | 5-Theme NVivo Codebook (67 nodes) | 15-Participant Member Check (100% response rate) | [Anonymized for Peer Review] | Submission ID: a8887652-1bc8-4192-9e41-7f3691ad0983
