# Supplementary material
Source: Research Square preprint supplement (doi:10.21203/rs.3.rs-8893138/v1)
Supplement: Supplementary file 2 [file 6196ae94f8660ba5f46274b2.docx]

**SUPPLEMENTARY FILE 1**

**Phase 2 Survey Instrument**

**Study Title:** Balancing Flexibility and Foresight: A Dynamic Capabilities Framework for Ambidextrous Strategic Innovation

**Journal:** Humanities and Social Sciences Communications

**Note:** *This document has been fully anonymized for blind peer review. Author names, institutional affiliations, and all identifying information have been removed in accordance with journal policy.*

**Contents:** Administration Protocol • Screening Criteria • Respondent Demographics • 5 Measurement Scale Sections (52 items) • Open-ended Questions • Closing

**SECTION A: ADMINISTRATION PROTOCOL**

**A.1 Survey Overview and Purpose**

| *This survey is part of a multi-phase research study examining how organizations configure strategic capabilities — specifically, strategic agility and sustained strategic direction — to achieve superior innovation performance. Your participation involves completing a structured questionnaire comprising validated multi-item scales used widely in strategic management and organizational research. The questionnaire should take approximately 20–25 minutes to complete. There are no right or wrong answers; we are interested in your honest assessment of your organization's current practices and performance.* |
| --- |

**A.2 Eligibility Criteria**

Participants must meet ALL of the following criteria to be included in the study:

**•** Currently hold a VP-level or higher strategic position (e.g., CEO, COO, CFO, CTO, CINO, CSO, or equivalent)

**•** Have responsibility for or significant involvement in strategic innovation decisions within their organization

**•** Currently employed by a firm with annual revenue of USD 500 million or above

**•** Organization has been operating for a minimum of 10 years

**•** Organization operates in one of the following sectors: Technology, Manufacturing, or Retail

**A.3 Data Collection Procedure**

Survey invitations were distributed via verified professional networks (LinkedIn), industry associations, and institutional partner contacts. Initial invitations included a brief description of the study, eligibility criteria, an estimated completion time, and a secure link to the online survey platform. A total of 750 targeted invitations were sent in two waves: Wave 1 (April 2024, n = 500) and Wave 2 (June 2024, n = 250). Up to two reminder emails were sent to non-respondents at 14-day intervals. Data collection closed on 31 August 2024.

**Response rate:** 46.7% (n = 350 usable responses received; n = 315 used in final analysis after data screening for missing values >10% and straight-lining detection)

**A.4 Informed Consent**

| *Before proceeding, participants confirmed that they had read and agreed to the Participant Information Sheet, which was provided as a separate attachment and displayed on the first page of the survey platform. Written consent was recorded electronically through a mandatory checkbox on the survey platform prior to the display of any questionnaire items. Consent was obtained between April 2024 and September 2024 by members of the research team. Participation was entirely voluntary and participants could withdraw at any time without consequence.* |
| --- |

**A.5 Response Anchors for Main Scales**

Unless otherwise indicated, all items in Sections C through G use the following 7-point Likert scale:

| **1** | **2** | **3** | **4** | **5** | **6** | **7** |
| --- | --- | --- | --- | --- | --- | --- |
| **1 = Strongly Disagree** | Disagree | Somewhat Disagree | Neutral | Somewhat Agree | Agree | **7 = Strongly Agree** |

**SECTION B: RESPONDENT AND ORGANIZATIONAL PROFILE**

**Instructions:** Please select the option that best describes you and your organization. This information is used solely for sample characterization purposes and will be reported only in aggregate form.

| **Question** | **Response Options** |
| --- | --- |
| **Current Role/Title** | *☐ CEO ☐ COO ☐ CFO ☐ CTO ☐ CINO / Chief Innovation Officer ☐ CSO / Chief Strategy Officer ☐ VP Strategy ☐ VP Innovation ☐ Other Senior Executive (please specify): _____________* |
| **Years in Current Role** | *☐ Less than 1 year ☐ 1–3 years ☐ 4–6 years ☐ 7–10 years ☐ More than 10 years* |
| **Total Years in Senior Leadership** | *☐ Less than 5 years ☐ 5–10 years ☐ 11–15 years ☐ 16–20 years ☐ More than 20 years* |
| **Industry Sector** | *☐ Technology (Hardware) ☐ Technology (Software) ☐ Technology (IT Services) ☐ Manufacturing (Automotive) ☐ Manufacturing (Industrial Equipment) ☐ Manufacturing (Consumer Goods) ☐ Retail (E-commerce) ☐ Retail (Brick & Mortar) ☐ Retail (Omnichannel)* |
| **Organization's Annual Revenue (USD)** | *☐ $500M – $999M ☐ $1B – $2.9B ☐ $3B – $5.9B ☐ $6B – $9.9B ☐ $10B or above* |
| **Organization's Age** | *☐ 10–15 years ☐ 16–25 years ☐ 26–40 years ☐ 41–60 years ☐ More than 60 years* |
| **Primary Geographic Market** | *☐ North America ☐ Europe ☐ Asia-Pacific ☐ Latin America ☐ Middle East / Africa ☐ Global (multi-regional)* |
| **R&D Expenditure as % of Revenue** | *☐ Less than 3% ☐ 3%–6% ☐ 7%–10% ☐ 11%–15% ☐ More than 15% ☐ Not applicable / Unsure* |

**SECTION C: STRATEGIC AGILITY (SA)**

The following items assess your organization's capacity for strategic agility — the ability to rapidly sense environmental changes and reconfigure resources and strategy in response. Please rate the extent to which each statement accurately describes your organization using the 7-point scale (1 = Strongly Disagree; 7 = Strongly Agree).

| **Construct** | **Cronbach's α** | **No. Items** | **Scale Source** |
| --- | --- | --- | --- |
| **Strategic Agility (SA)** | α = 0.91 | 12 items | *Adapted from Doz & Kosonen (2010)* |

**C.1 Strategic Sensitivity (SA-SS) — 4 Items**

| *Strategic sensitivity refers to the sharpness of perception of, and the intensity of awareness and attention to, strategic developments — including weak signals of change — in the business environment.* |
| --- |

| **Item** | **Statement** | **1** | **2** | **3** | **4** | **5** | **6** | **7** |
| --- | --- | --- | --- | --- | --- | --- | --- | --- |
| **SA-SS1** | Our organization continuously monitors weak signals of change in the competitive environment, even before they become obvious trends. | ○ | ○ | ○ | ○ | ○ | ○ | ○ |
| **SA-SS2** | Senior leaders in our organization quickly identify emerging strategic threats and opportunities before competitors do. | ○ | ○ | ○ | ○ | ○ | ○ | ○ |
| **SA-SS3** | We systematically gather and process intelligence from diverse external sources (customers, competitors, technology, regulators). | ○ | ○ | ○ | ○ | ○ | ○ | ○ |
| **SA-SS4** | Our strategic planning processes are designed to incorporate real-time environmental feedback rather than relying solely on periodic reviews. | ○ | ○ | ○ | ○ | ○ | ○ | ○ |

**C.2 Resource Fluidity (SA-RF) — 4 Items**

| *Resource fluidity refers to the internal capability to rapidly reallocate people, capital, and operational assets across strategic priorities in response to environmental signals.* |
| --- |

| **Item** | **Statement** | **1** | **2** | **3** | **4** | **5** | **6** | **7** |
| --- | --- | --- | --- | --- | --- | --- | --- | --- |
| **SA-RF1** | Our organization rapidly reallocates financial and human resources in response to emerging strategic opportunities. | ○ | ○ | ○ | ○ | ○ | ○ | ○ |
| **SA-RF2** | We can quickly redeploy personnel and reconfigure teams when strategic priorities shift. | ○ | ○ | ○ | ○ | ○ | ○ | ○ |
| **SA-RF3** | Resource allocation decisions in our organization are made with a high degree of speed and flexibility. | ○ | ○ | ○ | ○ | ○ | ○ | ○ |
| **SA-RF4** | Our budgeting and investment processes support dynamic reallocation rather than locking resources into fixed plans. | ○ | ○ | ○ | ○ | ○ | ○ | ○ |

**C.3 Leadership Unity (SA-LU) — 4 Items**

| *Leadership unity refers to the collective commitment of the top management team to make bold, fast, and jointly supported strategic decisions, even under conditions of uncertainty.* |
| --- |

| **Item** | **Statement** | **1** | **2** | **3** | **4** | **5** | **6** | **7** |
| --- | --- | --- | --- | --- | --- | --- | --- | --- |
| **SA-LU1** | Our top management team maintains strong collective alignment on strategic priorities despite environmental uncertainty. | ○ | ○ | ○ | ○ | ○ | ○ | ○ |
| **SA-LU2** | Senior leaders in our organization make decisive strategic choices quickly, without being paralyzed by conflicting views. | ○ | ○ | ○ | ○ | ○ | ○ | ○ |
| **SA-LU3** | There is a high degree of mutual trust and shared commitment among our top management team members. | ○ | ○ | ○ | ○ | ○ | ○ | ○ |
| **SA-LU4** | Our executive team can rapidly build consensus around strategic pivots when new information demands a change in direction. | ○ | ○ | ○ | ○ | ○ | ○ | ○ |

**SECTION D: SUSTAINED STRATEGIC DIRECTION (SV)**

The following items assess your organization's capacity for sustained strategic direction — the ability to maintain coherent long-term strategic commitments even under conditions of change and disruption. Please use the 7-point scale (1 = Strongly Disagree; 7 = Strongly Agree).

| **Construct** | **Cronbach's α** | **No. Items** | **Scale Source** |
| --- | --- | --- | --- |
| **Sustained Strategic Direction (SV)** | α = 0.88 | 9 items | *Adapted from Ortiz-de-Mandojana & Bansal (2016)* |

**D.1 Strategic Intent Coherence (SV-IC) — 3 Items**

| *Strategic intent coherence refers to the clarity and consistency of an organization's long-term strategic goals across planning cycles, leadership changes, and environmental shifts.* |
| --- |

| **Item** | **Statement** | **1** | **2** | **3** | **4** | **5** | **6** | **7** |
| --- | --- | --- | --- | --- | --- | --- | --- | --- |
| **SV-IC1** | Our strategic priorities and long-term goals remain consistent across multiple annual planning cycles. | ○ | ○ | ○ | ○ | ○ | ○ | ○ |
| **SV-IC2** | Our organization's strategic vision provides clear and stable guidance that shapes day-to-day decisions at all levels. | ○ | ○ | ○ | ○ | ○ | ○ | ○ |
| **SV-IC3** | Leadership transitions in our organization do not result in fundamental shifts to core strategic commitments. | ○ | ○ | ○ | ○ | ○ | ○ | ○ |

**D.2 Temporal Endurance (SV-TE) — 3 Items**

| *Temporal endurance refers to the organization's ability to sustain long-term strategic commitments despite short-term performance pressures, market volatility, and demands for immediate results.* |
| --- |

| **Item** | **Statement** | **1** | **2** | **3** | **4** | **5** | **6** | **7** |
| --- | --- | --- | --- | --- | --- | --- | --- | --- |
| **SV-TE1** | Our organization maintains long-term strategic investment commitments even when short-term financial pressures intensify. | ○ | ○ | ○ | ○ | ○ | ○ | ○ |
| **SV-TE2** | We resist the temptation to sacrifice long-term strategic objectives for short-term gains. | ○ | ○ | ○ | ○ | ○ | ○ | ○ |
| **SV-TE3** | Our organization has a track record of following through on multi-year strategic commitments to completion. | ○ | ○ | ○ | ○ | ○ | ○ | ○ |

**D.3 Capability Preservation (SV-CP) — 3 Items**

| *Capability preservation refers to the deliberate protection of core organizational competencies and capabilities during periods of significant change, restructuring, or transformation.* |
| --- |

| **Item** | **Statement** | **1** | **2** | **3** | **4** | **5** | **6** | **7** |
| --- | --- | --- | --- | --- | --- | --- | --- | --- |
| **SV-CP1** | We protect and invest in our core organizational capabilities even during major structural change initiatives. | ○ | ○ | ○ | ○ | ○ | ○ | ○ |
| **SV-CP2** | Our organization takes explicit steps to prevent the erosion of distinctive competencies during organizational transformation. | ○ | ○ | ○ | ○ | ○ | ○ | ○ |
| **SV-CP3** | Strategic decisions in our organization are evaluated in part based on their implications for preserving long-term capability assets. | ○ | ○ | ○ | ○ | ○ | ○ | ○ |

**SECTION E: INTEGRATION MECHANISMS (IM)**

This section assesses the organizational mechanisms that enable the simultaneous management of strategic agility and sustained direction. Please use the 7-point scale (1 = Strongly Disagree; 7 = Strongly Agree).

| **Construct** | **Cronbach's α** | **No. Items** | **Scale Source** |
| --- | --- | --- | --- |
| **Integration Mechanisms (IM)** | α = 0.91 | 21 items | *Smith & Lewis (2011); Birkinshaw & Gibson (2004); Nguyen & Zheng (2020)* |

**E.1 Paradoxical Leadership (IM-PL) — 6 Items**

| *Paradoxical leadership refers to the capacity of leaders to legitimize, embrace, and work productively with contradictory strategic demands rather than seeking to resolve or eliminate them.* |
| --- |

| **Item** | **Statement** | **1** | **2** | **3** | **4** | **5** | **6** | **7** |
| --- | --- | --- | --- | --- | --- | --- | --- | --- |
| **IM-PL1** | Leaders in our organization openly acknowledge and legitimize tensions between the need for change and the need for consistency. | ○ | ○ | ○ | ○ | ○ | ○ | ○ |
| **IM-PL2** | Our senior leaders model 'both/and' thinking — openly working with contradictions rather than forcing either/or choices. | ○ | ○ | ○ | ○ | ○ | ○ | ○ |
| **IM-PL3** | Leadership in our organization regularly uses strategic tensions as opportunities for learning rather than problems to be solved. | ○ | ○ | ○ | ○ | ○ | ○ | ○ |
| **IM-PL4** | Our leaders communicate stability and transformative change simultaneously, without appearing contradictory. | ○ | ○ | ○ | ○ | ○ | ○ | ○ |
| **IM-PL5** | Top management in our organization can fluidly shift between visionary and operational leadership styles as situations demand. | ○ | ○ | ○ | ○ | ○ | ○ | ○ |
| **IM-PL6** | Leaders in our organization are comfortable with sustained ambiguity and do not impose premature resolution on complex strategic challenges. | ○ | ○ | ○ | ○ | ○ | ○ | ○ |

**E.2 Contextual Ambidexterity (IM-CA) — 8 Items**

| *Contextual ambidexterity refers to the organizational capacity for individuals and teams to exercise situation-specific judgment about when to adapt and innovate versus when to align with established direction — without structural separation.* |
| --- |

| **Item** | **Statement** | **1** | **2** | **3** | **4** | **5** | **6** | **7** |
| --- | --- | --- | --- | --- | --- | --- | --- | --- |
| **IM-CA1** | Employees in our organization have clear frameworks guiding them on when to exercise adaptive judgment versus follow established strategic protocols. | ○ | ○ | ○ | ○ | ○ | ○ | ○ |
| **IM-CA2** | Teams are empowered to make autonomous decisions on how to achieve strategic objectives, while the objectives themselves are set centrally. | ○ | ○ | ○ | ○ | ○ | ○ | ○ |
| **IM-CA3** | Our performance management systems hold individuals accountable for both innovation speed and alignment with long-term strategic direction. | ○ | ○ | ○ | ○ | ○ | ○ | ○ |
| **IM-CA4** | Our organizational culture actively rewards proposals that embrace both urgency and patience in strategic execution. | ○ | ○ | ○ | ○ | ○ | ○ | ○ |
| **IM-CA5** | Individuals in our organization are trained and developed to make context-appropriate choices between adaptation and strategic consistency. | ○ | ○ | ○ | ○ | ○ | ○ | ○ |
| **IM-CA6** | Our organizational norms encourage 'both/and' thinking at all levels, not just at senior leadership. | ○ | ○ | ○ | ○ | ○ | ○ | ○ |
| **IM-CA7** | Employees understand and can articulate the organization's long-term direction, even while executing rapid short-term adaptations. | ○ | ○ | ○ | ○ | ○ | ○ | ○ |
| **IM-CA8** | Our organization has effective mechanisms for sharing knowledge and best practices between teams focused on innovation and those focused on strategic consistency. | ○ | ○ | ○ | ○ | ○ | ○ | ○ |

**E.3 Dynamic Balancing Capability (IM-DB) — 7 Items**

| *Dynamic balancing refers to the organizational capacity to continuously sense and adjust the relative emphasis placed on agility versus sustained direction in real time, in response to environmental signals.* |
| --- |

| **Item** | **Statement** | **1** | **2** | **3** | **4** | **5** | **6** | **7** |
| --- | --- | --- | --- | --- | --- | --- | --- | --- |
| **IM-DB1** | Our organization has regular, dedicated forums for senior leaders to assess whether strategic emphasis should shift toward agility or toward vision at any given time. | ○ | ○ | ○ | ○ | ○ | ○ | ○ |
| **IM-DB2** | We continuously adjust the balance of short-term adaptive investments and long-term strategic commitments based on real-time environmental feedback. | ○ | ○ | ○ | ○ | ○ | ○ | ○ |
| **IM-DB3** | Our organization uses an explicit portfolio logic that allocates resources across near-term (0–6 months), medium-term (6–24 months), and long-term (2–5+ year) horizons. | ○ | ○ | ○ | ○ | ○ | ○ | ○ |
| **IM-DB4** | Leaders in our organization accept and plan for strategic oscillation — recognizing that emphasis on agility versus vision naturally shifts over time. | ○ | ○ | ○ | ○ | ○ | ○ | ○ |
| **IM-DB5** | We have a formal or semi-formal mechanism for monitoring the balance between strategic agility and strategic coherence (e.g., a 'strategic tension index' or equivalent). | ○ | ○ | ○ | ○ | ○ | ○ | ○ |
| **IM-DB6** | Strategic balancing in our organization is treated as an ongoing, dynamic process rather than a one-time structural decision. | ○ | ○ | ○ | ○ | ○ | ○ | ○ |
| **IM-DB7** | Our organization proactively intervenes when we detect an excessive shift toward either agility or vision that may compromise overall strategic effectiveness. | ○ | ○ | ○ | ○ | ○ | ○ | ○ |

**SECTION F: INNOVATION PERFORMANCE (IP)**

This section assesses your organization's innovation performance over the past three years. It includes both objective (Part F.1) and subjective (Part F.2) measures. Please respond as accurately as possible based on your knowledge of organizational performance.

| **Construct** | **Cronbach's α** | **No. Items** | **Scale Source** |
| --- | --- | --- | --- |
| **Innovation Performance (IP)** | α = 0.87 (subjective) | 8 items | *Adapted from Garcia & Calantone (2002)* |

**F.1 Objective Performance Indicators (IP-OBJ) — 3 Items**

Please provide your best estimate of the following performance figures for your organization over the past three fiscal years:

| **Indicator** | **Response (estimate or range)** |
| --- | --- |
| **IP-OBJ1 — Patent Applications Filed (3-year total)** | ☐ 0 ☐ 1–5 ☐ 6–15 ☐ 16–30 ☐ 31–50 ☐ 51–100 ☐ More than 100 |
| **IP-OBJ2 — Percentage of Current Revenue from Products/Services Launched in the Last 3 Years** | ☐ Less than 10% ☐ 10%–20% ☐ 21%–30% ☐ 31%–40% ☐ 41%–50% ☐ More than 50% |
| **IP-OBJ3 — Average Time-to-Market for Major Innovations (months from concept to launch)** | ☐ Less than 6 months ☐ 6–12 months ☐ 13–18 months ☐ 19–24 months ☐ More than 24 months |

**F.2 Perceived Innovation Effectiveness (IP-PE) — 5 Items**

| *Please rate the following statements using the 7-point scale (1 = Strongly Disagree; 7 = Strongly Agree), reflecting your assessment of your organization's innovation performance relative to direct competitors.* |
| --- |

| **Item** | **Statement** | **1** | **2** | **3** | **4** | **5** | **6** | **7** |
| --- | --- | --- | --- | --- | --- | --- | --- | --- |
| **IP-PE1** | Our organization's overall innovation performance exceeds that of our primary competitors. | ○ | ○ | ○ | ○ | ○ | ○ | ○ |
| **IP-PE2** | We consistently bring new products and services to market faster than most firms in our industry. | ○ | ○ | ○ | ○ | ○ | ○ | ○ |
| **IP-PE3** | Our innovation pipeline generates commercially successful outcomes at a rate that surpasses industry norms. | ○ | ○ | ○ | ○ | ○ | ○ | ○ |
| **IP-PE4** | Our organization is widely recognized as an innovation leader within our industry sector. | ○ | ○ | ○ | ○ | ○ | ○ | ○ |
| **IP-PE5** | Our approach to innovation has generated sustainable competitive advantages that are difficult for competitors to replicate. | ○ | ○ | ○ | ○ | ○ | ○ | ○ |

**SECTION G: ENVIRONMENTAL CONDITIONS (EC)**

The following items assess the nature of the external environment in which your organization operates. Please use the 7-point scale (1 = Strongly Disagree; 7 = Strongly Agree) to rate the extent to which each statement describes your organization's current competitive environment.

| **Construct** | **Cronbach's α** | **No. Items** | **Scale Source** |
| --- | --- | --- | --- |
| **Environmental Conditions (EC)** | α = 0.82–0.84 | 12 items | *Adapted from Wilson & Thompson (2019)* |

**G.1 Environmental Volatility (EC-V) — 6 Items**

| *Environmental volatility captures the rate, unpredictability, and magnitude of change in the competitive landscape, including technology, market demand, competitive dynamics, and regulatory conditions.* |
| --- |

| **Item** | **Statement** | **1** | **2** | **3** | **4** | **5** | **6** | **7** |
| --- | --- | --- | --- | --- | --- | --- | --- | --- |
| **EC-V1** | The rate of change in our competitive environment is difficult to predict in advance. | ○ | ○ | ○ | ○ | ○ | ○ | ○ |
| **EC-V2** | Technology disruptions occur frequently in our industry and often require rapid strategic responses. | ○ | ○ | ○ | ○ | ○ | ○ | ○ |
| **EC-V3** | Customer preferences in our markets shift quickly and unpredictably. | ○ | ○ | ○ | ○ | ○ | ○ | ○ |
| **EC-V4** | Competitive moves by rivals in our industry are often surprising and difficult to anticipate. | ○ | ○ | ○ | ○ | ○ | ○ | ○ |
| **EC-V5** | Regulatory changes in our operating environment create frequent and significant strategic uncertainties. | ○ | ○ | ○ | ○ | ○ | ○ | ○ |
| **EC-V6** | The strategic assumptions underlying our business model require reassessment on a regular basis due to environmental turbulence. | ○ | ○ | ○ | ○ | ○ | ○ | ○ |

**G.2 Environmental Complexity (EC-C) — 6 Items**

| *Environmental complexity captures the number, diversity, and interdependence of factors that must be managed in an organization's competitive environment, including stakeholders, supply chains, technological systems, and regulatory frameworks.* |
| --- |

| **Item** | **Statement** | **1** | **2** | **3** | **4** | **5** | **6** | **7** |
| --- | --- | --- | --- | --- | --- | --- | --- | --- |
| **EC-C1** | Our competitive environment involves a large number of interdependent factors that must be managed simultaneously. | ○ | ○ | ○ | ○ | ○ | ○ | ○ |
| **EC-C2** | Understanding the drivers of competitive success in our industry requires integrating diverse and often conflicting information sources. | ○ | ○ | ○ | ○ | ○ | ○ | ○ |
| **EC-C3** | Our organization must manage relationships with a large number of diverse stakeholders whose interests often conflict. | ○ | ○ | ○ | ○ | ○ | ○ | ○ |
| **EC-C4** | The technological systems and processes central to our operations are highly complex and interdependent. | ○ | ○ | ○ | ○ | ○ | ○ | ○ |
| **EC-C5** | Causal relationships between strategic actions and outcomes in our industry are difficult to trace due to environmental complexity. | ○ | ○ | ○ | ○ | ○ | ○ | ○ |
| **EC-C6** | Managing our supply chain and partner ecosystem requires coordinating across a high number of interdependent relationships. | ○ | ○ | ○ | ○ | ○ | ○ | ○ |

**SECTION H: OPEN-ENDED REFLECTIONS (OPTIONAL)**

The following open-ended questions are optional but greatly assist in interpreting the quantitative findings. Responses will be anonymized and used only in aggregate thematic analysis.

**H1.** In your experience, what is the single most significant challenge your organization faces in balancing strategic agility with long-term strategic direction?

| *(Write your response here)* |
| --- |

**H2.** Can you describe a specific strategic decision or initiative in the past 2–3 years in which your organization had to actively balance speed of adaptation with strategic consistency? What was the outcome?

| *(Write your response here)* |
| --- |

**H3.** What organizational practices, processes, or leadership approaches have been most effective in enabling your organization to pursue both agility and long-term vision simultaneously?

| *(Write your response here)* |
| --- |

**H4.** How does the nature of your competitive environment (its volatility or complexity) influence how you manage the balance between flexibility and foresight in strategic decision-making?

| *(Write your response here)* |
| --- |

**CLOSING STATEMENT AND SUBMISSION**

| *Thank you sincerely for taking the time to complete this survey. Your responses are invaluable to this research. All data will be stored securely, processed in full accordance with applicable data protection legislation, and reported only in anonymized aggregate form. No individual, organization, or commercially sensitive information will be disclosed in any publication or report arising from this study. If you have any questions about this research or your participation, please contact the research team using the details provided in the Participant Information Sheet. You may withdraw your data at any time prior to the dataset being finalized (31 October 2024) by contacting the research team directly. This survey is now complete. Please click SUBMIT to record your responses.* |
| --- |

**Document Information:** Supplementary File 1 — Full Survey Instrument (Phase 2) | 52 items across 5 construct sections | Version 1.0 | [Anonymized for Peer Review] | Submission ID: a8887652-1bc8-4192-9e41-7f3691ad0983
