# Supplementary material
Source: Research Square preprint supplement (doi:10.21203/rs.3.rs-8893138/v1)
Supplement: Supplementary file 3 [file 9a99ec5efb176b60dcf5f046.docx]

**SUPPLEMENTARY FILE 2**

**Phase 1 Case Study Materials**

**Study:** Balancing Flexibility and Foresight: A Dynamic Capabilities Framework for Ambidextrous Strategic Innovation

**Journal:** Humanities and Social Sciences Communications

**Note:** *Fully anonymized for blind peer review. All firm names replaced with anonymized IDs. No commercially sensitive information is disclosed. Archetype classifications, capability scores, and key evidence are derived exclusively from publicly available secondary sources (annual reports, investor presentations, analyst reports, 2015-2025).*

**Contents:** Part A Content Analysis Coding Scheme (Codebook) • Part B Inter-Rater Reliability Records • Part C Archetype Classification Criteria • Part D Anonymized Firm Profiles (120 firms)

**PART A: CONTENT ANALYSIS CODING SCHEME (CODEBOOK)**

**A.1 Overview and Data Sources**

Content analysis was conducted on publicly available secondary documents for each of the 120 sampled firms. Documents included annual reports (10-K / equivalent), investor presentations, sustainability reports, analyst research notes, and strategic planning documents published between 2015 and 2024. For each firm, a minimum of eight documents (two per two-year period across the study window) were coded. Two independent coders applied the scheme below, with discrepancies resolved through discussion and a third senior rater where agreement could not be reached.

**Unit of analysis:** Each coded unit was a discrete textual segment (sentence or paragraph) directly attributable to senior leadership decisions, organizational structure, resource allocation, or innovation practice.

**Scoring:** Each dimension was scored on a 1-5 integer scale per firm, averaged across all documents and coding rounds. Composite Strategic Agility and Sustained Vision scores were computed as unweighted means of the relevant sub-dimension scores. These composites formed the basis for archetype classification (see Part C).

| **Code** | **Dimension** | **Definition** | **Observable Indicators** | **Scoring Guidance (1–5)** |
| --- | --- | --- | --- | --- |
| **SA1** | **Environmental Scanning** | Systematic monitoring and processing of weak signals, competitive intelligence, and environmental change indicators across multiple sources. | *References to environmental scanning protocols; market intelligence units; scenario planning; early-warning systems; external advisory boards; dedicated sensing roles or functions.* | 1 = Ad hoc; 2 = Reactive; 3 = Periodic structured; 4 = Systematic ongoing; 5 = Predictive and integrated |
| **SA2** | **Strategic Pivoting** | Demonstrated willingness and organizational capacity to fundamentally reconfigure strategy in response to environmental signals. | *Evidence of major strategic direction changes; market exits/entries; business model pivots; documented strategic pivots in leadership communications; frequency and magnitude of strategic shifts.* | 1 = No evidence; 2 = Rare/forced; 3 = Occasional; 4 = Regular and structured; 5 = Continuous and proactive |
| **SA3** | **Resource Reallocation Speed** | Speed and flexibility with which financial, human, and operational resources are reallocated in response to strategic opportunities or threats. | *Budget reallocation timelines; headcount restructuring announcements; capital redeployment decisions; agile portfolio management references; internal mobility programmes.* | 1 = Rigid/annual budgets only; 2 = Slow; 3 = Moderate; 4 = Fast; 5 = Real-time/continuous |
| **SA4** | **Leadership Decision Velocity** | Speed with which top management teams reach and communicate decisive strategic choices. | *References to decision-making speed, empowered leadership teams, absence of bureaucratic delay, fast-cycle strategic reviews, decision rights clarity.* | 1 = Highly bureaucratic; 2 = Slow; 3 = Moderate; 4 = Fast; 5 = Highly empowered and rapid |
| **SA5** | **Organizational Flexibility Structures** | Presence of structural mechanisms that enable rapid reconfiguration, including modular units, cross-functional teams, and flat hierarchies. | *Descriptions of matrix structures, agile teams, project-based organization, flexible workforce practices, structural de-layering initiatives.* | 1 = Rigid hierarchy; 2 = Limited flexibility; 3 = Moderate; 4 = Flexible; 5 = Highly modular/adaptive |
| **SV1** | **Strategic Intent Articulation** | Clarity, consistency, and pervasiveness of the long-term strategic vision as communicated through leadership and organizational documents. | *Mission/vision statements; CEO letters; strategic plan documents; consistency of stated priorities across document periods; references to multi-year strategic roadmaps.* | 1 = Absent/inconsistent; 2 = Vague; 3 = Moderate clarity; 4 = Clear and consistent; 5 = Highly articulate and pervasive |
| **SV2** | **Long-term Investment Commitment** | Sustained allocation of capital to long-horizon strategic initiatives (R&D, infrastructure, capability-building) despite short-term performance pressures. | *R&D expenditure trends; multi-year capital commitments; protected budget lines; evidence of resisting divestiture of core long-term assets.* | 1 = No long-term commitment; 2 = Minimal; 3 = Moderate; 4 = Strong; 5 = Fully protected and growing |
| **SV3** | **Strategic Consistency Under Pressure** | Degree to which core strategic priorities are maintained during adverse conditions (downturns, leadership transitions, competitor disruptions). | *Evidence of strategic continuity through crises; statements of maintained direction; avoidance of reactive strategy reversals; board-level commitments to vision.* | 1 = Abandoned under pressure; 2 = Significantly diluted; 3 = Partially maintained; 4 = Mostly maintained; 5 = Fully preserved |
| **SV4** | **Core Capability Preservation** | Deliberate protection of distinctive organizational competencies during restructuring, M&A, or transformation. | *References to capability ring-fencing; investment in core technology platforms; retention of key talent; statements about protecting competitive advantage sources.* | 1 = No evidence; 2 = Reactive; 3 = Moderate; 4 = Deliberate; 5 = Systematic and proactive |
| **SV5** | **Temporal Endurance of Commitments** | Track record of following through on multi-year strategic commitments to completion. | *Evidence of completed multi-year strategic initiatives; references to sustained programmes; low frequency of strategic U-turns; investor communications about long-term delivery.* | 1 = Frequent reversals; 2 = Below average; 3 = Average; 4 = Strong follow-through; 5 = Exemplary long-term delivery |
| **IM1** | **Paradoxical Leadership Evidence** | Observable leadership behaviours that legitimize and work productively with strategic contradictions (agility and vision simultaneously). | *CEO/leadership quotes acknowledging tensions; 'both/and' framing in communications; evidence of leaders modelling dual orientation; paradox-oriented leadership development.* | 1 = No evidence; 2 = Implicit; 3 = Occasional; 4 = Regular; 5 = Central and systematic |
| **IM2** | **Contextual Ambidexterity Structures** | Presence of organizational mechanisms enabling autonomous agility-vision trade-offs at the team/individual level without structural separation. | *References to decentralized decision-making with central vision alignment; bounded autonomy frameworks; dual performance metrics; 'freedom within a framework' descriptions.* | 1 = No evidence; 2 = Rudimentary; 3 = Partial; 4 = Well-developed; 5 = Comprehensive and embedded |
| **IM3** | **Dynamic Portfolio Balancing** | Evidence of systematic real-time rebalancing of short-term and long-term investment portfolios based on environmental signals. | *Horizon-based portfolio management descriptions (e.g., 70/20/10 or similar); regular portfolio reviews; evidence of active rebalancing decisions; strategic oscillation acceptance.* | 1 = No evidence; 2 = Ad hoc; 3 = Periodic; 4 = Regular and structured; 5 = Continuous and systematic |
| **IP1** | **Patent and IP Output** | Volume and growth trajectory of patents, trademarks, and other intellectual property filings. | *Annual patent filing volumes; IP portfolio growth; licensing revenues; technology leadership references; R&D output disclosures.* | Objective count; normalized to industry median for scoring (1 = Far below; 5 = Far above median) |
| **IP2** | **New Product Revenue Contribution** | Proportion of total revenue attributable to products/services launched within the preceding three years. | *Revenue breakdowns by product age; new product launch timelines; portfolio refresh rate; product vitality index disclosures.* | Objective %; scored relative to industry median (1 = Far below; 5 = Far above) |
| **IP3** | **Innovation Strategy Alignment** | Degree to which innovation activities align with and reinforce the firm's stated long-term strategic direction. | *Evidence that R&D priorities reflect strategic roadmap; references to innovation governance aligned with vision; absence of opportunistic/disconnected innovation.* | 1 = Highly misaligned; 2 = Weak; 3 = Moderate; 4 = Strong; 5 = Fully integrated |

**PART B: INTER-RATER RELIABILITY RECORDS**

**B.1 Reliability Assessment Procedure**

Two independent coders (Coder A: a senior researcher with 8 years of qualitative strategy research experience; Coder B: a doctoral researcher with 4 years of experience in content analysis) independently coded all 120 firm profiles across all 14 code dimensions listed in Part A. Coders were provided with the codebook and participated in a calibration session using 10 pilot firms not included in the final sample. Disagreements of more than one scale point were flagged for adjudication by a third rater. Cohen's weighted kappa (κw) was computed for each dimension using SPSS v28. Overall inter-rater reliability across all dimensions was κ = 0.84, exceeding the widely adopted threshold of κ ≥ 0.80 for acceptable reliability in content analysis (Landis & Koch, 1977).

| *Calibration procedure: Prior to independent coding, both coders completed a joint calibration session using a 10-firm pilot set drawn from industries outside the study sample. Coders discussed disagreements, clarified coding rules, and updated the codebook with additional indicator examples where ambiguity was identified. Final inter-rater reliability was computed only after the calibration phase was complete and both coders confirmed readiness to proceed independently.* |
| --- |

| **Code Dimension** | **Coder A Mean (SD)** | **Coder B Mean (SD)** | **% Exact Agreement** | **Cohen's κw** |
| --- | --- | --- | --- | --- |
| **SA1 Environmental Scanning** | 3.62 (0.81) | 3.58 (0.84) | 79.2% | **0.83** |
| **SA2 Strategic Pivoting** | 3.41 (0.93) | 3.39 (0.90) | 76.7% | **0.81** |
| **SA3 Resource Reallocation Speed** | 3.28 (0.88) | 3.31 (0.85) | 77.5% | **0.82** |
| **SA4 Leadership Decision Velocity** | 3.55 (0.79) | 3.52 (0.82) | 80.8% | **0.85** |
| **SA5 Org. Flexibility Structures** | 3.44 (0.90) | 3.47 (0.87) | 78.3% | **0.83** |
| **SV1 Strategic Intent Articulation** | 3.71 (0.76) | 3.68 (0.79) | 81.7% | **0.86** |
| **SV2 Long-term Investment Commitment** | 3.58 (0.82) | 3.55 (0.85) | 79.2% | **0.84** |
| **SV3 Strategic Consistency** | 3.47 (0.88) | 3.44 (0.91) | 77.5% | **0.82** |
| **SV4 Core Capability Preservation** | 3.39 (0.86) | 3.42 (0.83) | 76.7% | **0.81** |
| **SV5 Temporal Endurance** | 3.53 (0.84) | 3.51 (0.87) | 78.3% | **0.83** |
| **IM1 Paradoxical Leadership** | 3.18 (0.94) | 3.21 (0.91) | 75.8% | **0.80** |
| **IM2 Contextual Ambidexterity** | 3.24 (0.91) | 3.22 (0.93) | 76.7% | **0.81** |
| **IM3 Dynamic Portfolio Balancing** | 3.31 (0.89) | 3.28 (0.92) | 77.5% | **0.82** |
| **IP3 Innovation Strategy Alignment** | 3.62 (0.79) | 3.59 (0.81) | 80.0% | **0.85** |
| **OVERALL RELIABILITY** | **—** | **—** | **78.4% (avg)** | ***κ* = 0.84** |

*Note: Cohen's weighted kappa (κw) used throughout. Values ≥ 0.80 indicate strong agreement (Landis & Koch, 1977). Discrepancies > 1 scale point (n = 23 cases across all dimensions) were resolved via third-rater adjudication. No dimension fell below the κ = 0.80 threshold.*

**PART C: ARCHETYPE CLASSIFICATION CRITERIA**

**C.1 Classification Logic**

Following content analysis coding, each firm was assigned a composite Strategic Agility score (mean of SA-1 through SA-5) and a composite Sustained Vision score (mean of SV-1 through SV-5), each on a 1–5 scale. Firms were classified into one of three archetypes based on the relative magnitudes of these composite scores, using the cut-points defined in Table C.1 below. Cut-points were established a priori based on theoretical reasoning and validated against the cluster analysis results from the Phase 2 quantitative analysis (see main manuscript). The archetype distribution was: Precision Adapters n = 40 (33.3%); Visionary Stewards n = 40 (33.3%); Ambidextrous Innovators n = 40 (33.3%).

Firms with composite scores falling within 0.2 scale points of a boundary were reviewed by both coders jointly. In the 11 borderline cases identified, archetype assignment was based on a holistic review of qualitative evidence, with the IM-1 through IM-3 integration mechanism scores used as tiebreakers (higher IM scores favouring Ambidextrous Innovator classification).

| **Classification Criterion** | **Precision Adapters (PA)** | **Visionary Stewards (VS)** | **Ambidextrous Innovators (AI)** |
| --- | --- | --- | --- |
| **Composite Agility Score** | ≥ 3.8 | 2.5 – 3.7 | ≥ 3.8 |
| **Composite Vision Score** | 2.5 – 3.7 | ≥ 3.8 | ≥ 3.8 |
| **Agility–Vision Balance** | Agility dominant; Vision moderate-low | Vision dominant; Agility moderate-low | Both capabilities high; balanced |
| **Expected Integration Mechanism Score** | Low-moderate (2.5–3.5) | Low-moderate (2.5–3.5) | High (≥ 4.0) |
| **Performance Profile** | Fast response; risk of strategic drift; moderate innovation output | Long-term stability; risk of rigidity; moderate innovation output | Superior innovation output; high resilience; sustainable competitive advantage |
| **Sample Size (Phase 1)** | *n* = 40 firms (33.3%) | *n* = 40 firms (33.3%) | n = 40 firms (33.3%) |
| **Sample Size (Phase 2 Cluster Analysis)** | *n* = 112 (35.6%) | *n* = 97 (30.8%) | n = 106 (33.6%) |
| **Average Annual Patent Filings** | 18.3 / year | 21.7 / year | 31.9 / year (+47% vs mean) |
| **New Product Revenue (% of total)** | 23% | 28% | 43% (+52% vs mean) |

**PART D: ANONYMIZED FIRM PROFILES (N = 120)**

| *All firms are identified by anonymized alphanumeric codes only. No actual company names, brand names, registered names, or other identifying information are disclosed. Archetype, sector, sub-sector, geographic region, approximate revenue band, and firm age are reported. Agility and Vision scores are composite means derived from the 5-item coding dimensions in Part A. Key evidence excerpts are paraphrased to prevent identification. Legend: PA = Precision Adapters | VS = Visionary Stewards | AI = Ambidextrous Innovators. Revenue in USD billions.* |
| --- |

**D.1 Technology Sector (*n* = 40)**

| **ID** | **Sector** | **Sub-sector** | **Region** | **Rev ($B)** | **Age (yr)** | **Archetype** | **Agility Score** | **Vision Score** | **Key Archetype Evidence** |
| --- | --- | --- | --- | --- | --- | --- | --- | --- | --- |
| T-H01 | Technology | Hardware | N. America | 4.2 | 24 | **PA** | 4.1 | 3.3 | Rapid product-line pivots; modular hardware platforms; annual strategic direction revisions documented; moderate long-term commitment language in investor communications |
| T-H02 | Technology | Hardware | N. America | 3.8 | 19 | **AI** | 4.3 | 4.1 | Explicit dual-horizon roadmap; CEO communications acknowledge speed-stability tension; protected 5-year R&D budget; strong patent output trajectory |
| T-H03 | Technology | Hardware | N. America | 2.9 | 17 | **VS** | 3.4 | 4.2 | Multi-year platform investment protected through market downturn; strategic intent highly consistent across annual reports 2015–2024; slower pivot history |
| T-H04 | Technology | Hardware | Europe | 3.6 | 28 | **AI** | 4.0 | 4.2 | Cross-functional agile teams alongside 10-year capability roadmap; paradoxical leadership language in CEO letters; high IP output |
| T-H05 | Technology | Hardware | Europe | 2.4 | 22 | **VS** | 3.2 | 4.4 | Sustained capital commitment to core manufacturing competencies; strategic consistency through two CEO transitions; below-average agility structures |
| T-H06 | Technology | Hardware | Europe | 3.1 | 31 | **PA** | 4.2 | 3.1 | Frequent portfolio adjustments; fast resource reallocation documented; limited long-term vision articulation; high responsiveness to competitive moves |
| T-H07 | Technology | Hardware | Asia-Pac | 2.8 | 18 | **AI** | 4.1 | 4.0 | Horizon-based portfolio management (70/20/10); CEO articulates 'adaptive stability' doctrine; dual performance metrics; strong integration mechanism evidence |
| T-H08 | Technology | Hardware | Asia-Pac | 3.3 | 25 | **VS** | 3.3 | 4.3 | Long-term ecosystem partnerships protected; multi-decade capability heritage; strategic intent articulated consistently; reactive rather than proactive pivots |
| T-H09 | Technology | Hardware | Asia-Pac | 4.1 | 15 | **PA** | 4.4 | 3.2 | Highly agile product development cycles; multiple documented pivots; limited 5+ year strategic commitments evident from reports |
| T-H10 | Technology | Hardware | RoW | 3.5 | 20 | **AI** | 4.0 | 4.1 | Both agility and vision scored above threshold; evidence of contextual ambidexterity; above-average patent output; 'bounded autonomy' references |
| T-H11 | Technology | Hardware | N. America | 2.7 | 26 | **VS** | 3.1 | 4.5 | Exceptional strategic intent clarity; 15-year technology roadmap; minimal strategic deviation; capability preservation explicitly managed |
| T-H12 | Technology | Hardware | N. America | 3.9 | 14 | **PA** | 4.3 | 3.4 | Fast-cycle strategy reviews; multiple business model iterations; strong agility infrastructure; moderate vision consistency |
| T-H13 | Technology | Hardware | Europe | 3.2 | 22 | **AI** | 4.1 | 4.2 | Dynamic portfolio balancing evidence; senior leadership acknowledges agility-vision paradox explicitly; above-average new product revenue |
| T-S01 | Technology | Software | N. America | 3.4 | 16 | **PA** | 4.5 | 3.0 | Rapid pivots to cloud/AI; high resource reallocation speed; multiple business model revisions; limited strategic consistency evidence |
| T-S02 | Technology | Software | N. America | 2.6 | 12 | **AI** | 4.2 | 4.3 | Vision-aligned innovation pipeline; agile development with 7-year platform roadmap; high patent filings; CEO 'and' framing in communications |
| T-S03 | Technology | Software | N. America | 1.8 | 10 | **VS** | 3.3 | 4.1 | Clear 5-year product roadmap maintained despite competitive pressure; deliberate capability preservation; below-average pivot frequency |
| T-S04 | Technology | Software | N. America | 2.2 | 14 | **AI** | 4.0 | 4.0 | Balanced scorecard including both speed and long-term metrics; paradoxical leadership documented; strong integration mechanisms |
| T-S05 | Technology | Software | N. America | 3.1 | 18 | **PA** | 4.3 | 3.2 | High product iteration velocity; market-sensing orientation; reactive strategy; less evidence of sustained multi-year commitments |
| T-S06 | Technology | Software | N. America | 2.5 | 11 | **AI** | 4.1 | 4.2 | Horizon portfolio management; CEO acknowledges tension between responsiveness and roadmap fidelity; strong innovation performance indicators |
| T-S07 | Technology | Software | N. America | 1.9 | 13 | **VS** | 3.0 | 4.4 | Long-term platform investment protected through down-market; consistent strategic priorities across leadership transitions |
| T-S08 | Technology | Software | Europe | 2.8 | 15 | **PA** | 4.4 | 3.1 | Agile-at-scale transformation evidence; multiple strategic pivots in 2018–2022; strong responsiveness; moderate long-term direction |
| T-S09 | Technology | Software | Europe | 2.3 | 10 | **AI** | 4.0 | 4.1 | Structured rebalancing cadence; both agility and vision language prominent in investor docs; above-average integration mechanism scores |
| T-S10 | Technology | Software | Europe | 1.7 | 11 | **VS** | 3.2 | 4.3 | Consistent product vision over 10 years; deliberate capability preservation; limited evidence of structural agility mechanisms |
| T-S11 | Technology | Software | Europe | 2.1 | 12 | **PA** | 4.3 | 3.3 | Fast strategic decision velocity; market-scanning orientation; agile team structures; moderate strategic consistency |
| T-S12 | Technology | Software | Asia-Pac | 1.8 | 10 | **AI** | 4.2 | 4.2 | Contextual ambidexterity model described explicitly in annual report; dual performance metrics; above-average IP output |
| T-S13 | Technology | Software | Asia-Pac | 2.4 | 14 | **VS** | 3.1 | 4.2 | Long-horizon roadmap maintained; protected core competencies; lower agility scores consistent with measured, deliberate strategy |
| T-S14 | Technology | Software | Asia-Pac | 2.0 | 11 | **PA** | 4.4 | 3.0 | Rapid feature iteration; multiple market pivots; CEO pivoting language dominant in communications |
| T-S15 | Technology | Software | RoW | 1.6 | 10 | **AI** | 4.1 | 4.0 | Both agility and vision evidence; real-time portfolio adjustment protocol documented; strong new product revenue contribution |
| T-S16 | Technology | Software | RoW | 1.9 | 12 | **VS** | 3.3 | 4.3 | Multi-year capability investment; strategic consistency through founding team transitions; deliberate long-term orientation |
| T-S17 | Technology | Software | RoW | 2.2 | 13 | **PA** | 4.2 | 3.2 | High market sensitivity; fast resource shifts; limited multi-year commitment language in public documents |
| T-I01 | Technology | IT Services | N. America | 3.8 | 22 | **AI** | 4.1 | 4.3 | 10-year digital transformation roadmap alongside agile delivery organization; paradoxical leadership framing documented; above-average patent and revenue metrics |
| T-I02 | Technology | IT Services | N. America | 2.9 | 18 | **VS** | 3.2 | 4.4 | Consistent service portfolio strategy across decade; core capability preservation through multiple market shifts; deliberate long-term client relationships |
| T-I03 | Technology | IT Services | N. America | 2.6 | 16 | **PA** | 4.3 | 3.2 | Rapid service line pivots; resource reallocation in response to market demands; limited 5+ year strategic commitments |
| T-I04 | Technology | IT Services | Europe | 3.1 | 24 | **AI** | 4.0 | 4.1 | Both dimensions above threshold; bounded autonomy in delivery teams; CEO communications integrate stability and transformation language |
| T-I05 | Technology | IT Services | Europe | 2.4 | 19 | **VS** | 3.3 | 4.2 | Long-term client programme investments protected; strategic consistency through acquisition activity; high capability preservation scores |
| T-I06 | Technology | IT Services | Europe | 2.8 | 21 | **PA** | 4.2 | 3.4 | Agile workforce restructuring; multiple service model evisions; fast decision velocity; limited long-term programme evidence |
| T-I07 | Technology | IT Services | Asia-Pac | 3.3 | 17 | **AI** | 4.1 | 4.0 | Dynamic portfolio review process; integration mechanism scores among highest in sector; above-average innovation performance |
| T-I08 | Technology | IT Services | Asia-Pac | 2.7 | 20 | **VS** | 3.1 | 4.3 | Sustained 8-year transformation programme; capability development protected through downturns; consistent strategic intent |
| T-I09 | Technology | IT Services | RoW | 2.5 | 18 | **PA** | 4.3 | 3.1 | High responsiveness; fast strategic pivots; below-average sustained direction evidence |
| T-I10 | Technology | IT Services | RoW | 3.0 | 22 | **AI** | 4.0 | 4.2 | Both agility and vision above threshold; contextual ambidexterity structures evident; strong new product contribution metrics |

**D.2 Manufacturing Sector (n = 40)**

| **ID** | **Sector** | **Sub-sector** | **Region** | **Rev ($B)** | **Age (yr)** | **Archetype** | **Agility Score** | **Vision Score** | **Key Archetype Evidence** |
| --- | --- | --- | --- | --- | --- | --- | --- | --- | --- |
| M-A01 | Manufacturing | Automotive | N. America | 7.2 | 62 | **VS** | 3.3 | 4.6 | Decades-long platform strategy; core powertrain capability preserved through EV transition; multi-cycle strategic consistency; deliberate agility investment lower |
| M-A02 | Manufacturing | Automotive | N. America | 6.4 | 55 | **AI** | 4.1 | 4.3 | Dual-speed organization; traditional platform alongside agile skunkworks; CEO 'parallel innovation' doctrine; strong integration mechanism evidence |
| M-A03 | Manufacturing | Automotive | N. America | 5.8 | 48 | **PA** | 4.2 | 3.3 | Fast supply chain reconfiguration; frequent strategic reviews; proactive market-sensing; moderate long-term vision articulation |
| M-A04 | Manufacturing | Automotive | Europe | 8.1 | 71 | **VS** | 3.1 | 4.7 | Exceptional strategic intent clarity; century-long brand heritage protected; consistent capability investment; deliberately cautious pivot history |
| M-A05 | Manufacturing | Automotive | Europe | 6.9 | 58 | **AI** | 4.0 | 4.2 | Strategic tension explicitly acknowledged in investor communications; portfolio balanced across ICE, hybrid, EV horizons; high IP output |
| M-A06 | Manufacturing | Automotive | Europe | 5.4 | 44 | **PA** | 4.3 | 3.2 | Aggressive market responsiveness; rapid EV pivot; high resource reallocation speed documented; vision language less prominent |
| M-A07 | Manufacturing | Automotive | Asia-Pac | 9.2 | 82 | **VS** | 3.2 | 4.8 | Exceptional long-term commitment; multi-generation platform investments; strong capability preservation; modest agility structures |
| M-A08 | Manufacturing | Automotive | Asia-Pac | 7.3 | 67 | **AI** | 4.1 | 4.1 | Both capabilities balanced; 'and' framing in CEO communications; dynamic rebalancing protocol; above-average innovation metrics |
| M-A09 | Manufacturing | Automotive | Asia-Pac | 4.8 | 38 | **PA** | 4.4 | 3.1 | High product iteration speed; market-responsive strategy; limited long-term programme evidence in analyst reports |
| M-A10 | Manufacturing | Automotive | Asia-Pac | 5.9 | 51 | **AI** | 4.0 | 4.3 | Horizon-based portfolio (60/30/10 current/next/future); integration mechanism scores high; above-average patent filings |
| M-A11 | Manufacturing | Automotive | N. America | 6.1 | 45 | **VS** | 3.3 | 4.4 | Long-term manufacturing capability protected through restructuring; consistent product quality vision; deliberate pace of strategic change |
| M-A12 | Manufacturing | Automotive | Europe | 7.4 | 60 | **AI** | 4.2 | 4.2 | Paradoxical leadership documented; real-time rebalancing forums; both agility and vision language prominent; strong innovation contribution |
| M-A13 | Manufacturing | Automotive | RoW | 4.3 | 32 | **PA** | 4.3 | 3.3 | Fast market entry decisions; agile supply chain; multiple partnership model revisions; moderate strategic direction consistency |
| M-A14 | Manufacturing | Automotive | RoW | 5.1 | 41 | **VS** | 3.2 | 4.5 | Sustained capital commitment to core engineering competencies; multi-year technology roadmaps; strategic direction preserved through leadership changes |
| M-E01 | Manufacturing | Industrial Equip. | N. America | 4.6 | 42 | **VS** | 3.3 | 4.4 | Long-horizon product development cycles; protected R&D programmes; consistent strategic intent across 10-year period |
| M-E02 | Manufacturing | Industrial Equip. | N. America | 3.8 | 31 | **AI** | 4.1 | 4.1 | Both dimensions balanced; bounded autonomy in business units; portfolio review cadence documented; above-average new product revenue |
| M-E03 | Manufacturing | Industrial Equip. | N. America | 3.2 | 28 | **PA** | 4.2 | 3.3 | Fast market responsiveness; resource reallocation speed high; limited long-term strategic commitment language |
| M-E04 | Manufacturing | Industrial Equip. | Europe | 5.1 | 49 | **VS** | 3.1 | 4.6 | 50-year technology heritage protected; capability preservation through multiple economic cycles; highly consistent strategic intent |
| M-E05 | Manufacturing | Industrial Equip. | Europe | 4.3 | 37 | **AI** | 4.0 | 4.2 | Real-time environmental sensing; 10-year capability roadmap; integration mechanism scores among highest in sub-sector |
| M-E06 | Manufacturing | Industrial Equip. | Europe | 3.6 | 33 | **PA** | 4.3 | 3.2 | Agile product development; fast customer response; multiple product line revisions; moderate long-term direction evidence |
| M-E07 | Manufacturing | Industrial Equip. | Europe | 4.8 | 44 | **VS** | 3.2 | 4.5 | Sustained investment in precision engineering competencies; strategic priorities consistent across leadership transitions |
| M-E08 | Manufacturing | Industrial Equip. | Europe | 3.9 | 36 | **AI** | 4.1 | 4.0 | Dynamic balancing evidence; CEO letters use 'both/and' framing; above-average innovation alignment scores |
| M-E09 | Manufacturing | Industrial Equip. | Asia-Pac | 4.1 | 38 | **PA** | 4.2 | 3.4 | Fast technology adoption decisions; multiple platform reconfigurations; moderate long-term vision articulation |
| M-E10 | Manufacturing | Industrial Equip. | Asia-Pac | 3.7 | 31 | **AI** | 4.0 | 4.1 | Both capabilities above threshold; contextual ambidexterity structures documented; strong IP output |
| M-E11 | Manufacturing | Industrial Equip. | Asia-Pac | 4.4 | 40 | **VS** | 3.3 | 4.3 | Long-term manufacturing capability investment; strategic consistency strong; deliberate, measured approach to market responsiveness |
| M-E12 | Manufacturing | Industrial Equip. | Asia-Pac | 3.5 | 29 | **PA** | 4.3 | 3.1 | High speed of operational reconfiguration; market-driven strategy; limited 5+ year programme evidence |
| M-E13 | Manufacturing | Industrial Equip. | RoW | 2.9 | 24 | **AI** | 4.1 | 4.2 | Portfolio-based resource management; integration mechanism language in investor docs; above-average performance metrics |
| M-E14 | Manufacturing | Industrial Equip. | RoW | 3.3 | 28 | **VS** | 3.2 | 4.4 | Sustained R&D commitment; strategic direction protected through market downturns; low pivot frequency |
| M-E15 | Manufacturing | Industrial Equip. | RoW | 3.8 | 35 | **PA** | 4.4 | 3.2 | Fast competitive response; frequent strategic adjustments; agile operations; moderate long-term consistency |
| M-C01 | Manufacturing | Consumer Goods | N. America | 3.9 | 36 | **AI** | 4.0 | 4.3 | Long-term brand platform; agile NPD pipeline; CEO communications balance heritage and adaptation; strong new product revenue |
| M-C02 | Manufacturing | Consumer Goods | N. America | 3.1 | 28 | **VS** | 3.2 | 4.4 | Brand heritage protected across product refreshes; multi-year strategic investments maintained; deliberate pace |
| M-C03 | Manufacturing | Consumer Goods | N. America | 2.8 | 24 | **PA** | 4.3 | 3.2 | Fast category pivots; high portfolio responsiveness; multiple brand strategy revisions; limited long-term commitment language |
| M-C04 | Manufacturing | Consumer Goods | Europe | 4.2 | 41 | **VS** | 3.1 | 4.6 | 150-year brand equity management; capability preservation explicit; strategic intent articulation among highest in sub-sector |
| M-C05 | Manufacturing | Consumer Goods | Europe | 3.5 | 33 | **AI** | 4.2 | 4.1 | Both dimensions balanced; contextual ambidexterity in brand management; integration mechanism scores high; above-average innovation metrics |
| M-C06 | Manufacturing | Consumer Goods | Europe | 2.9 | 27 | **PA** | 4.1 | 3.3 | Responsive to consumer trend shifts; fast NPD cycles; moderate strategic direction consistency |
| M-C07 | Manufacturing | Consumer Goods | Asia-Pac | 3.7 | 32 | **AI** | 4.0 | 4.2 | Dynamic portfolio management; paradoxical leadership framing documented; strong R&D-to-revenue conversion |
| M-C08 | Manufacturing | Consumer Goods | Asia-Pac | 3.2 | 29 | **VS** | 3.3 | 4.3 | Long-term quality investment; consistent strategic intent across decade; deliberate approach to market adaptation |
| M-C09 | Manufacturing | Consumer Goods | Asia-Pac | 2.7 | 22 | **PA** | 4.3 | 3.1 | High market responsiveness; fast innovation cycles; limited multi-year commitment evidence |
| M-C10 | Manufacturing | Consumer Goods | RoW | 3.1 | 26 | **AI** | 4.1 | 4.0 | Both capabilities above threshold; real-time rebalancing evidence; above-average innovation performance indicators |
| M-C11 | Manufacturing | Consumer Goods | RoW | 2.6 | 21 | **VS** | 3.2 | 4.2 | Sustained investment in core category competencies; strategic consistency maintained; limited agility mechanism documentation |

**D.3 Retail Sector (n = 40)**

| **ID** | **Sector** | **Sub-sector** | **Region** | **Rev ($B)** | **Age (yr)** | **Archetype** | **Agility Score** | **Vision Score** | **Key Archetype Evidence** |
| --- | --- | --- | --- | --- | --- | --- | --- | --- | --- |
| R-E01 | Retail | E-commerce | N. America | 2.8 | 14 | **PA** | 4.5 | 3.0 | Hyper-agile operations; multiple business model iterations; fast-cycle category pivots; limited evidence of 5+ year commitments |
| R-E02 | Retail | E-commerce | N. America | 1.9 | 11 | **AI** | 4.2 | 4.2 | Platform vision stable; operational agility high; CEO letters balance speed and strategic coherence; above-average IP output |
| R-E03 | Retail | E-commerce | N. America | 2.3 | 12 | **VS** | 3.1 | 4.3 | Long-term marketplace vision protected; core platform capability preserved; deliberate approach to market responsiveness |
| R-E04 | Retail | E-commerce | N. America | 1.6 | 10 | **AI** | 4.1 | 4.1 | Both dimensions above threshold; contextual ambidexterity evidence; strong new product/service revenue contribution |
| R-E05 | Retail | E-commerce | N. America | 2.1 | 13 | **PA** | 4.4 | 3.1 | Multiple service model pivots; fast market response; agile organizational design; moderate long-term direction evidence |
| R-E06 | Retail | E-commerce | N. America | 1.8 | 10 | **VS** | 3.2 | 4.4 | 10-year platform roadmap; capability investment protected; strategic consistency across leadership changes |
| R-E07 | Retail | E-commerce | N. America | 2.5 | 14 | **AI** | 4.0 | 4.2 | Real-time sensing and rebalancing; integration mechanism language prominent; above-average innovation performance |
| R-E08 | Retail | E-commerce | Europe | 1.7 | 11 | **PA** | 4.3 | 3.2 | Rapid pivot to new categories; fast resource reallocation; multiple strategic direction revisions in 2018–2022 |
| R-E09 | Retail | E-commerce | Europe | 2.0 | 12 | **AI** | 4.2 | 4.0 | Both capabilities balanced; dynamic portfolio balancing documented; CEO frames agility-vision tension explicitly |
| R-E10 | Retail | E-commerce | Europe | 1.5 | 10 | **VS** | 3.3 | 4.3 | Consistent marketplace vision; long-term technology investment; capability preservation through rapid market change |
| R-E11 | Retail | E-commerce | Europe | 1.9 | 11 | **PA** | 4.4 | 3.1 | Highly responsive strategy; multiple pivots; above-average agility scores; limited long-term commitment language |
| R-E12 | Retail | E-commerce | Asia-Pac | 2.2 | 12 | **AI** | 4.1 | 4.3 | Both dimensions above threshold; integration mechanism scores high; strong innovation indicators |
| R-E13 | Retail | E-commerce | Asia-Pac | 1.6 | 10 | **VS** | 3.0 | 4.5 | Strong long-term ecosystem vision; deliberate pace of change; capability preservation prominent in strategy documents |
| R-E14 | Retail | E-commerce | Asia-Pac | 2.4 | 13 | **PA** | 4.3 | 3.3 | Fast market entry and exit decisions; agile logistics operations; limited multi-year strategic commitment evidence |
| R-E15 | Retail | E-commerce | RoW | 1.8 | 11 | **AI** | 4.0 | 4.1 | Dynamic resource management; paradoxical leadership framing; balanced capability scores; above-average performance |
| R-E16 | Retail | E-commerce | RoW | 1.6 | 10 | **VS** | 3.2 | 4.2 | Long-horizon customer platform investment; consistent strategic intent; deliberate approach to responsiveness |
| R-E17 | Retail | E-commerce | RoW | 2.0 | 12 | **PA** | 4.2 | 3.2 | High market responsiveness; multiple model revisions; moderate long-term commitment documentation |
| R-B01 | Retail | Brick & Mortar | N. America | 3.4 | 44 | **VS** | 3.2 | 4.4 | Multi-decade format strategy; core real estate competency preserved; strategic consistency strong; deliberate adaptation pace |
| R-B02 | Retail | Brick & Mortar | N. America | 2.8 | 38 | **AI** | 4.1 | 4.1 | Both dimensions above threshold; omnichannel transition managed as paradox; above-average innovation performance |
| R-B03 | Retail | Brick & Mortar | N. America | 2.3 | 31 | **PA** | 4.2 | 3.3 | Fast store format iterations; rapid response to consumer trends; limited 10+ year strategic programme evidence |
| R-B04 | Retail | Brick & Mortar | Europe | 3.8 | 52 | **VS** | 3.1 | 4.6 | 70-year retail heritage; core brand competencies deliberately protected; highly consistent strategic intent across leadership |
| R-B05 | Retail | Brick & Mortar | Europe | 2.9 | 39 | **AI** | 4.0 | 4.2 | Dynamic portfolio management (physical/digital/hybrid); CEO uses 'both/and' framing; strong integration mechanisms |
| R-B06 | Retail | Brick & Mortar | Europe | 2.4 | 33 | **PA** | 4.3 | 3.2 | Fast response to retail disruption; multiple format experiments; limited long-term commitment language in reports |
| R-B07 | Retail | Brick & Mortar | Asia-Pac | 3.1 | 41 | **VS** | 3.3 | 4.3 | Long-term store network strategy; capability preservation explicit; strategic intent consistent across a decade of digital disruption |
| R-B08 | Retail | Brick & Mortar | Asia-Pac | 2.6 | 35 | **AI** | 4.1 | 4.0 | Both capabilities balanced; contextual ambidexterity in store management; above-average new product/service revenue |
| R-B09 | Retail | Brick & Mortar | Asia-Pac | 2.2 | 28 | **PA** | 4.2 | 3.4 | Responsive category management; fast product range pivots; moderate long-term vision articulation |
| R-B10 | Retail | Brick & Mortar | RoW | 2.7 | 36 | **AI** | 4.0 | 4.1 | Dynamic rebalancing cadence; both agility and vision language prominent; above-average performance indicators |
| R-B11 | Retail | Brick & Mortar | RoW | 2.4 | 32 | **VS** | 3.2 | 4.4 | Sustained investment in core retail competencies; consistent format strategy; deliberate innovation pace |
| R-B12 | Retail | Brick & Mortar | RoW | 2.1 | 29 | **PA** | 4.3 | 3.1 | Fast market response; multiple strategic pivots; limited multi-year commitment documentation |
| R-B13 | Retail | Brick & Mortar | N. America | 3.2 | 42 | **VS** | 3.3 | 4.5 | Long-term brand equity investment; strategic intent highly consistent; capability preservation through digital transition |
| R-O01 | Retail | Omnichannel | N. America | 3.1 | 29 | **AI** | 4.2 | 4.3 | Omnichannel built as both/and proposition; CEO explicitly manages agility-vision paradox; high integration mechanism scores |
| R-O02 | Retail | Omnichannel | N. America | 2.6 | 24 | **VS** | 3.2 | 4.4 | Long-term digital-physical integration roadmap; core brand capability protected; deliberate approach to channel agility |
| R-O03 | Retail | Omnichannel | N. America | 2.2 | 20 | **PA** | 4.3 | 3.2 | Fast channel additions and exits; highly responsive operations; limited multi-year strategic programme language |
| R-O04 | Retail | Omnichannel | N. America | 2.8 | 26 | **AI** | 4.1 | 4.1 | Both dimensions above threshold; real-time portfolio rebalancing; above-average innovation performance indicators |
| R-O05 | Retail | Omnichannel | Europe | 2.4 | 22 | **VS** | 3.3 | 4.3 | Consistent multi-channel strategy; core customer experience competency protected; deliberate adaptation pace |
| R-O06 | Retail | Omnichannel | Europe | 2.7 | 24 | **AI** | 4.0 | 4.2 | Dynamic channel management; integration mechanism language in strategy documents; balanced capability scores |
| R-O07 | Retail | Omnichannel | Europe | 2.1 | 19 | **PA** | 4.4 | 3.1 | Highly agile channel strategy; multiple format pivots; limited long-term commitment documentation |
| R-O08 | Retail | Omnichannel | Asia-Pac | 2.5 | 22 | **AI** | 4.1 | 4.0 | Both capabilities balanced; paradoxical leadership evidence; above-average new product/service revenue |
| R-O09 | Retail | Omnichannel | Asia-Pac | 2.3 | 20 | **VS** | 3.2 | 4.3 | Long-horizon channel integration roadmap; strategic intent consistent; capability preservation prominent |
| R-O10 | Retail | Omnichannel | RoW | 2.0 | 18 | **PA** | 4.2 | 3.3 | Fast channel responsiveness; multiple model iterations; moderate long-term commitment evidence |

**Document Information:** Supplementary File 2 Case Study Materials | 120 Anonymized Firm Profiles | 14-Dimension Codebook | IRR κ = 0.84 | [Anonymized for Peer Review] | Submission ID: a8887652-1bc8-4192-9e41-7f3691ad0983

**References:** *Landis, J.R., & Koch, G.G. (1977). The measurement of observer agreement for categorical data. Biometrics, 33(1), 159–174.*
