# Supplementary material
Source: Research Square preprint supplement (doi:10.21203/rs.3.rs-8893138/v1)
Supplement: Supplementary file 4 [file b1372a29400e40c4c5179511.docx]

**SUPPLEMENTARY FILE 4**

**Quantitative Data and Analysis Scripts**

**Study:** Balancing Flexibility and Foresight: A Dynamic Capabilities Framework for Ambidextrous Strategic Innovation

**Journal:** Humanities and Social Sciences Communications

**Note:** *Fully anonymized for blind peer review. All participant-level data are aggregated and de-identified. No individual respondent can be identified from the data presented. All analysis scripts are provided in full and are ready to execute on the supplied dataset.*

**Contents:** Part A Variable Dictionary • Part B: Data Screening & Descriptive Statistics • Part C: Confirmatory Factor Analysis (CFA) Script (Mplus) • Part D: Structural Equation Model (SEM) Script (Mplus) • Part E: Cluster Analysis Script (R) • Part F: Moderated Regression Script (R) • Part G: Common Method Bias Tests • Part H: Aggregated Dataset (first 30 cases; full dataset in accompanying .csv)

**PART A: VARIABLE DICTIONARY**

**A.1 Overview**

The Phase 2 quantitative dataset comprises *n* = 315 complete responses from senior executives, drawn from a stratified random sample across technology, manufacturing, and retail sectors. The dataset used in all analyses is provided as a separate .csv file (SF4dataset anonymized.csv) accompanying this document. The variable naming convention follows a construct_subscale_item format (e.g., *SASS1* = Strategic Agility, Strategic Sensitivity, Item 1). All items were measured on a 7-point Likert scale (1 = Strongly Disagree; 7 = Strongly Agree) unless otherwise noted. Objective innovation performance items used ordered categorical response scales (see Section 3.1 of the main manuscript and Supplementary File 1 for full item wording).

| *Data screening: Prior to analysis, 35 responses were removed from the initial n = 350 for the following reasons: missing data exceeding 10% of items (n = 17); straight-lining detected by intra-individual response variance < 0.10 (n = 11); multivariate outliers identified by Mahalanobis distance at p < .001 (n = 7). Final analytical sample: n = 315. No imputation was used; listwise deletion was applied throughout.* |
| --- |

**A.2 Variable Dictionary**

**Construct 1: Strategic Agility (SA) 12 items | α = 0.91**

| **Variable** | **Subscale** | **Item Wording (abbreviated)** | **Scale** | **Mean** | **SD** |
| --- | --- | --- | --- | --- | --- |
| **SASS1** | Strat. Sensitivity | Org. continuously monitors weak signals of change in competitive environment | 1-7 | 3.89 | 0.84 |
| **SASS2** | Strat. Sensitivity | Senior leaders quickly identify emerging threats/opportunities before competitors | 1-7 | 3.74 | 0.91 |
| **SASS3** | Strat. Sensitivity | Systematically gathers intelligence from diverse external sources | 1-7 | 3.82 | 0.88 |
| **SASS4** | Strat. Sensitivity | Strategic planning incorporates real-time environmental feedback | 1-7 | 3.71 | 0.93 |
| **SARF1** | Resource Fluidity | Rapidly reallocates financial and human resources to emerging opportunities | 1-7 | 3.68 | 0.89 |
| **SARF2** | Resource Fluidity | Can quickly redeploy personnel when strategic priorities shift | 1-7 | 3.61 | 0.92 |
| **SARF3** | Resource Fluidity | Resource allocation decisions made with high speed and flexibility | 1-7 | 3.55 | 0.94 |
| **SARF4** | Resource Fluidity | Budgeting processes support dynamic reallocation over fixed plans | 1-7 | 3.47 | 0.97 |
| **SALU1** | Leadership Unity | Top team maintains strong alignment despite environmental uncertainty | 1-7 | 3.78 | 0.86 |
| **SALU2** | Leadership Unity | Senior leaders make decisive choices quickly without paralysis | 1-7 | 3.71 | 0.90 |
| **SALU3** | Leadership Unity | High mutual trust and shared commitment among top team | 1-7 | 3.84 | 0.83 |
| **SALU4** | Leadership Unity | Executive team rapidly builds consensus around strategic pivots | 1-7 | 3.67 | 0.92 |

**Construct 2: Sustained Strategic Direction (SV) 9 items | α = 0.88**

| **Variable** | **Subscale** | **Item Wording (abbreviated)** | **Scale** | **Mean** | **SD** |
| --- | --- | --- | --- | --- | --- |
| **SVIC1** | Intent Coherence | Strategic priorities remain consistent across multiple planning cycles | 1-7 | 3.94 | 0.79 |
| **SVIC2** | Intent Coherence | Strategic vision provides clear, stable guidance at all levels | 1-7 | 4.01 | 0.76 |
| **SVIC3** | Intent Coherence | Leadership transitions do not shift core strategic commitments | 1-7 | 3.88 | 0.83 |
| **SVTE1** | Temporal Endurance | Maintains long-term investments even under short-term pressure | 1-7 | 3.81 | 0.86 |
| **SVTE2** | Temporal Endurance | Resists sacrificing long-term objectives for short-term gains | 1-7 | 3.76 | 0.89 |
| **SVTE3** | Temporal Endurance | Track record of following through on multi-year commitments | 1-7 | 3.83 | 0.82 |
| **SVCP1** | Capability Pres. | Protects core capabilities even during major structural change | 1-7 | 3.91 | 0.80 |
| **SVCP2** | Capability Pres. | Takes steps to prevent erosion of distinctive competencies | 1-7 | 3.87 | 0.84 |
| **SVCP3** | Capability Pres. | Strategic decisions evaluated for implications on capability assets | 1-7 | 3.79 | 0.87 |

**Construct 3: Integration Mechanisms (IM) 21 items | α = 0.91**

| **Variable** | **Subscale** | **Item Wording (abbreviated)** | **Scale** | **Mean** | **SD** |
| --- | --- | --- | --- | --- | --- |
| **IMPL1** | Paradox. Ldship | Leaders openly legitimize tensions between change and consistency | 1-7 | 4.03 | 0.94 |
| **IMPL2** | Paradox. Ldship | Senior leaders model 'both/and' thinking work with contradictions | 1-7 | 3.97 | 0.98 |
| **IMPL3** | Paradox. Ldship | Leadership uses tensions as learning opportunities not problems | 1-7 | 3.89 | 1.02 |
| **IMPL4** | Paradox. Ldship | Leaders communicate stability and transformation simultaneously | 1-7 | 3.84 | 1.01 |
| **IMPL5** | Paradox. Ldship | Leadership fluidly shifts between visionary and operational styles | 1-7 | 3.91 | 0.96 |
| **IMPL6** | Paradox. Ldship | Leaders comfortable with sustained strategic ambiguity | 1-7 | 3.78 | 1.04 |
| **IMCA1** | Contextual Ambid. | Clear frameworks guide when to adapt vs. follow strategic protocols | 1-7 | 3.94 | 0.91 |
| **IMCA2** | Contextual Ambid. | Teams empowered on how; objectives set centrally | 1-7 | 4.08 | 0.88 |
| **IMCA3** | Contextual Ambid. | Performance systems reward both innovation speed and alignment | 1-7 | 3.82 | 0.96 |
| **IMCA4** | Contextual Ambid. | Culture rewards proposals embracing both urgency and patience | 1-7 | 3.71 | 1.01 |
| **IMCA5** | Contextual Ambid. | Employees trained to make context-appropriate agility-vision choices | 1-7 | 3.67 | 1.03 |
| **IMCA6** | Contextual Ambid. | Both/and norms encouraged at all organizational levels | 1-7 | 3.63 | 1.06 |
| **IMCA7** | Contextual Ambid. | Employees understand long-term direction while executing rapid adaptations | 1-7 | 3.88 | 0.93 |
| **IMCA8** | Contextual Ambid. | Effective knowledge sharing between innovation and consistency teams | 1-7 | 3.74 | 0.99 |
| **IMDB1** | Dynamic Balancing | Regular forums to assess agility vs. vision emphasis | 1-7 | 3.71 | 0.97 |
| **IMDB2** | Dynamic Balancing | Continuously adjusts short and long-term investments based on signals | 1-7 | 3.78 | 0.94 |
| **IMDB3** | Dynamic Balancing | Explicit portfolio logic across near/medium/long-term horizons | 1-7 | 3.64 | 1.03 |
| **IMDB4** | Dynamic Balancing | Leaders accept and plan for strategic oscillation as natural | 1-7 | 3.57 | 1.08 |
| **IMDB5** | Dynamic Balancing | Formal mechanism for monitoring agility-vision balance | 1-7 | 3.44 | 1.11 |
| **IMDB6** | Dynamic Balancing | Strategic balancing treated as ongoing dynamic process | 1-7 | 3.68 | 1.01 |
| **IMDB7** | Dynamic Balancing | Proactively intervenes when excessive shift to either pole detected | 1-7 | 3.53 | 1.07 |

**Construct 4: Innovation Performance (IP) 8 items**

| **Variable** | **Subscale** | **Item Wording (abbreviated)** | **Scale** | **Mean** | **SD** |
| --- | --- | --- | --- | --- | --- |
| **IPPAT** | Objective | Patent applications filed (3-year total) ordered categorical | Cat. | 2.41 | 1.18 |
| **IPNPD** | Objective | % revenue from products launched < 3 years ago ordered categorical | Cat. | 2.87 | 1.24 |
| **IPTTM** | Objective | Average time-to-market for major innovations (months) ordered categorical | Cat. | 2.63 | 1.19 |
| **IPPE1** | Perceived Effect. | Innovation performance exceeds primary competitors | 1-7 | 4.12 | 0.91 |
| **IPPE2** | Perceived Effect. | Consistently bring new products to market faster than industry | 1-7 | 4.04 | 0.94 |
| **IPPE3** | Perceived Effect. | Innovation pipeline generates successful outcomes above industry norms | 1-7 | 3.98 | 0.97 |
| **IPPE4** | Perceived Effect. | Recognized as innovation leader within industry sector | 1-7 | 4.08 | 0.92 |
| **IPPE5** | Perceived Effect. | Innovation has generated sustainable, hard-to-replicate advantage | 1-7 | 4.01 | 0.95 |

**Construct 5: Environmental Conditions (EC) 12 items**

| **Variable** | **Subscale** | **Item Wording (abbreviated)** | **Scale** | **Mean** | **SD** |
| --- | --- | --- | --- | --- | --- |
| **ECV1** | Volatility | Rate of change in competitive environment is difficult to predict | 1-7 | 4.87 | 0.94 |
| **ECV2** | Volatility | Technology disruptions occur frequently and require rapid response | 1-7 | 4.94 | 0.91 |
| **ECV3** | Volatility | Customer preferences shift quickly and unpredictably | 1-7 | 4.71 | 0.97 |
| **ECV4** | Volatility | Competitive moves by rivals are often surprising and hard to anticipate | 1-7 | 4.63 | 1.01 |
| **ECV5** | Volatility | Regulatory changes create frequent strategic uncertainties | 1-7 | 4.42 | 1.08 |
| **ECV6** | Volatility | Strategic assumptions require reassessment regularly due to turbulence | 1-7 | 4.78 | 0.96 |
| **ECC1** | Complexity | Competitive environment involves many interdependent factors | 1-7 | 5.04 | 0.87 |
| **ECC2** | Complexity | Understanding competitive success requires integrating conflicting info | 1-7 | 4.97 | 0.92 |
| **ECC3** | Complexity | Manages diverse stakeholders with often conflicting interests | 1-7 | 4.88 | 0.94 |
| **ECC4** | Complexity | Technological systems are highly complex and interdependent | 1-7 | 4.91 | 0.91 |
| **ECC5** | Complexity | Causal links between actions and outcomes are difficult to trace | 1-7 | 4.74 | 0.98 |
| **ECC6** | Complexity | Supply chain coordination requires managing many interdependent relationships | 1-7 | 4.82 | 0.93 |

**Control Variables**

| **Variable** | **Type** | **Description** | **Mean** | **SD** |
| --- | --- | --- | --- | --- |
| **FIRMSIZE** | Control (log-transformed) | Log of annual firm revenue in USD billions (self-reported, ordered categorical, midpoint-coded) | 0.48 | 0.31 |
| **FIRMAGE** | Control (log-transformed) | Log of firm age in years | 1.39 | 0.29 |
| **INDTECH** | Dummy (ref: Retail) | 1 = Technology sector, 0 = Other | 0.33 | 0.47 |
| **INDMFG** | Dummy (ref: Retail) | 1 = Manufacturing sector, 0 = Other | 0.33 | 0.47 |
| **PRIORIP** | Control (t-1 performance) | Self-reported innovation performance in prior year (single item, 1-7 scale) | 3.91 | 0.88 |

**PART B: DATA SCREENING AND DESCRIPTIVE STATISTICS**

**B.1 R Script Data Screening**

| # ============================================================  # SUPPLEMENTARY FILE 4 — Part B: Data Screening  # Balancing Flexibility and Foresight  # R version 4.3.1 | [Anonymized for Peer Review]  # ============================================================  # --- 1. Load packages -------------------------------------------  library(tidyverse) # data wrangling  library(psych) # descriptives, alpha, omega  library(MVN) # multivariate normality tests  library(mice) # missing data diagnostics (MCAR test)  library(outliers) # Mahalanobis distance outlier detection  library(careless) # straight-lining / inattentive responding  # --- 2. Import data ---------------------------------------------  dat_raw <- read.csv("SF4_dataset_anonymized.csv", stringsAsFactors = FALSE)  cat("N initial:", nrow(dat_raw), "\n") # Expected: 350  # --- 3. Missing data screening ----------------------------------  # Flag cases with >10% missing across Likert items  likert_cols <- grep("^(SA|SV|IM|IP_PE|EC)_", names(dat_raw), value=TRUE)  miss_prop <- rowMeans(is.na(dat_raw[, likert_cols]))  dat_nomiss <- dat_raw[miss_prop <= 0.10, ]  cat("Removed (>10% missing):", nrow(dat_raw) - nrow(dat_nomiss), "\n") # Expected: 17  # Little's MCAR test on remaining missing data  # (requires mcar_test from naniar package)  # naniar::mcar_test(dat_nomiss[, likert_cols])  # --- 4. Straight-lining detection -------------------------------  # Flag cases with intra-individual variance < 0.10  isd <- apply(dat_nomiss[, likert_cols], 1, var, na.rm=TRUE)  dat_nosl <- dat_nomiss[isd >= 0.10, ]  cat("Removed (straight-lining):", nrow(dat_nomiss) - nrow(dat_nosl), "\n") # Expected: 11  # --- 5. Multivariate outlier detection --------------------------  # Mahalanobis distance, chi-sq critical value at p < .001  complete_idx <- complete.cases(dat_nosl[, likert_cols])  dat_comp <- dat_nosl[complete_idx, ]  maha_d <- mahalanobis(dat_comp[, likert_cols],  colMeans(dat_comp[, likert_cols]),  cov(dat_comp[, likert_cols]))  chi_crit <- qchisq(0.999, df = length(likert_cols))  dat_final <- dat_comp[maha_d <= chi_crit, ]  cat("Removed (Mahal outliers):", nrow(dat_comp) - nrow(dat_final), "\n") # Expected: 7  cat("Final N:", nrow(dat_final), "\n") # Expected: 315  # --- 6. Save clean dataset ---------------------------------------  write.csv(dat_final, "SF4_dataset_clean_n315.csv", row.names=FALSE) |
| --- |

**B.2 R Script Descriptive Statistics and Correlation Matrix**

| # --- Composite scores -------------------------------------------  dat <- read.csv("SF4_dataset_clean_n315.csv")  # Strategic Agility composite (mean of 12 items)  sa_items <- grep("^SA_", names(dat), value=TRUE)  sv_items <- grep("^SV_", names(dat), value=TRUE)  im_pl_itm <- grep("^IM_PL",names(dat), value=TRUE)  im_ca_itm <- grep("^IM_CA",names(dat), value=TRUE)  im_db_itm <- grep("^IM_DB",names(dat), value=TRUE)  ip_pe_itm <- grep("^IP_PE",names(dat), value=TRUE)  ec_v_itm <- grep("^EC_V", names(dat), value=TRUE)  ec_c_itm <- grep("^EC_C", names(dat), value=TRUE)  dat$SA <- rowMeans(dat[, sa_items], na.rm=TRUE)  dat$SV <- rowMeans(dat[, sv_items], na.rm=TRUE)  dat$IM_PL <- rowMeans(dat[, im_pl_itm], na.rm=TRUE)  dat$IM_CA <- rowMeans(dat[, im_ca_itm], na.rm=TRUE)  dat$IM_DB <- rowMeans(dat[, im_db_itm], na.rm=TRUE)  dat$IP_PE <- rowMeans(dat[, ip_pe_itm], na.rm=TRUE)  dat$EV <- rowMeans(dat[, ec_v_itm], na.rm=TRUE)  dat$EC <- rowMeans(dat[, ec_c_itm], na.rm=TRUE)  # --- Descriptive statistics -------------------------------------  composite_vars <- c("SA","SV","IM_PL","IM_CA","IM_DB","IP_PE","EV","EC")  desc <- psych::describe(dat[, composite_vars])  print(round(desc[, c("mean","sd","median","skew","kurtosis","min","max")], 3))  # --- Cronbach's alpha -------------------------------------------  for(nm in c("sa_items","sv_items","im_pl_itm","im_ca_itm",  "im_db_itm","ip_pe_itm","ec_v_itm","ec_c_itm")) {  itms <- get(nm)  alpha <- psych::alpha(dat[, itms])$total$raw_alpha  cat(nm, "alpha =", round(alpha,3), "\n")  }  # --- Pearson correlation matrix ---------------------------------  cor_mat <- cor(dat[, composite_vars], use="pairwise.complete.obs")  print(round(cor_mat, 3))  # Significance test  psych::corr.test(dat[, composite_vars], method="pearson") |
| --- |

**PART C: CONFIRMATORY FACTOR ANALYSIS (CFA) — MPLUS SYNTAX**

| *Software: Mplus version 8.10 (Muthén & Muthén). Estimator: MLR (maximum likelihood with robust standard errors). Missing data: full information maximum likelihood (FIML). The CFA tests a 5-factor oblique model (SA, SV, IM, IPPE, EC). Fit targets: CFI/TLI > 0.90; RMSEA < 0.08; SRMR < 0.08. Reported fit: χ²/df = 1.87, CFI = 0.94, TLI = 0.93, RMSEA = 0.048, SRMR = 0.041.* |
| --- |

| TITLE: CFA — Balancing Flexibility and Foresight (Phase 2)  Supplementary File 4, Part C | [Anonymized]  DATA: FILE = SF4_dataset_clean_n315.csv;  VARIABLE:  NAMES = ID  SA_SS_1-SA_SS_4 SA_RF_1-SA_RF_4 SA_LU_1-SA_LU_4  SV_IC_1-SV_IC_3 SV_TE_1-SV_TE_3 SV_CP_1-SV_CP_3  IM_PL_1-IM_PL_6 IM_CA_1-IM_CA_8 IM_DB_1-IM_DB_7  IP_PE_1-IP_PE_5  EC_V_1-EC_V_6 EC_C_1-EC_C_6  FIRM_SIZE FIRM_AGE IND_TECH IND_MFG PRIOR_IP  ARCHETYPE SECTOR;  USEVARIABLES = SA_SS_1-SA_SS_4 SA_RF_1-SA_RF_4 SA_LU_1-SA_LU_4  SV_IC_1-SV_IC_3 SV_TE_1-SV_TE_3 SV_CP_1-SV_CP_3  IM_PL_1-IM_PL_6 IM_CA_1-IM_CA_8 IM_DB_1-IM_DB_7  IP_PE_1-IP_PE_5  EC_V_1-EC_V_6 EC_C_1-EC_C_6;  MISSING = ALL(999);  ANALYSIS:  ESTIMATOR = MLR; ! Robust ML for non-normality  TYPE = GENERAL;  MODEL:  ! Factor 1: Strategic Agility  SA BY SA_SS_1* SA_SS_2 SA_SS_3 SA_SS_4  SA_RF_1 SA_RF_2 SA_RF_3 SA_RF_4  SA_LU_1 SA_LU_2 SA_LU_3 SA_LU_4;  SA@1; ! Fix variance to 1 for identification  ! Factor 2: Sustained Strategic Direction  SV BY SV_IC_1* SV_IC_2 SV_IC_3  SV_TE_1 SV_TE_2 SV_TE_3  SV_CP_1 SV_CP_2 SV_CP_3;  SV@1;  ! Factor 3: Integration Mechanisms (higher-order with 3 sub-factors)  PL BY IM_PL_1* IM_PL_2 IM_PL_3 IM_PL_4 IM_PL_5 IM_PL_6;  CA BY IM_CA_1* IM_CA_2 IM_CA_3 IM_CA_4 IM_CA_5  IM_CA_6 IM_CA_7 IM_CA_8;  DB BY IM_DB_1* IM_DB_2 IM_DB_3 IM_DB_4 IM_DB_5 IM_DB_6 IM_DB_7;  PL@1; CA@1; DB@1;  ! Factor 4: Perceived Innovation Performance  IP BY IP_PE_1* IP_PE_2 IP_PE_3 IP_PE_4 IP_PE_5;  IP@1;  ! Factor 5a: Environmental Volatility  EV BY EC_V_1* EC_V_2 EC_V_3 EC_V_4 EC_V_5 EC_V_6;  EV@1;  ! Factor 5b: Environmental Complexity  EC BY EC_C_1* EC_C_2 EC_C_3 EC_C_4 EC_C_5 EC_C_6;  EC@1;  ! Allow oblique factor correlations  SA WITH SV PL CA DB IP EV EC;  SV WITH PL CA DB IP EV EC;  PL WITH CA DB; CA WITH DB;  IP WITH EV EC; EV WITH EC;  OUTPUT:  STDYX; ! Fully standardized solution  MODINDICES (10.0); ! Modification indices >= 10  RESIDUAL; ! Residual variances  TECH1; ! Parameter specifications  TECH4; ! Estimated means and covariance matrix of factors  CINTERVAL; ! 95% confidence intervals  SAMP; ! Sample statistics |
| --- |

**PART D: STRUCTURAL EQUATION MODEL (SEM) MPLUS SYNTAX**

| *The structural model tests direct effects of SA and SV on innovation performance (IP), mediated by PL, CA, and DB (paradoxical leadership, contextual ambidexterity, dynamic balancing). Bootstrapped confidence intervals (5,000 draws) used for mediation inference. Reported fit: χ²/df = 1.94, CFI = 0.93, TLI = 0.92, RMSEA = 0.051, SRMR = 0.044. Total variance explained: R² = 0.67.* |
| --- |

| TITLE: Full SEM — Direct, Mediated, and Interaction Effects  Supplementary File 4, Part D | [Anonymized]  DATA: FILE = SF4_dataset_clean_n315.csv;  VARIABLE:  NAMES = ID SA_SS_1-SA_SS_4 SA_RF_1-SA_RF_4 SA_LU_1-SA_LU_4  SV_IC_1-SV_IC_3 SV_TE_1-SV_TE_3 SV_CP_1-SV_CP_3  IM_PL_1-IM_PL_6 IM_CA_1-IM_CA_8 IM_DB_1-IM_DB_7  IP_PE_1-IP_PE_5 EC_V_1-EC_V_6 EC_C_1-EC_C_6  FIRM_SIZE FIRM_AGE IND_TECH IND_MFG PRIOR_IP;  USEVARIABLES = SA_SS_1-SA_LU_4 SV_IC_1-SV_CP_3  IM_PL_1-IM_DB_7 IP_PE_1-IP_PE_5  FIRM_SIZE FIRM_AGE IND_TECH IND_MFG PRIOR_IP;  MISSING = ALL(999);  DEFINE:  ! Create interaction term (mean-centred SA x SV)  SA_mean = MEAN(SA_SS_1,SA_SS_2,SA_SS_3,SA_SS_4,  SA_RF_1,SA_RF_2,SA_RF_3,SA_RF_4,  SA_LU_1,SA_LU_2,SA_LU_3,SA_LU_4);  SV_mean = MEAN(SV_IC_1,SV_IC_2,SV_IC_3,  SV_TE_1,SV_TE_2,SV_TE_3,  SV_CP_1,SV_CP_2,SV_CP_3);  SA_c = SA_mean - 3.73; ! grand-mean centre  SV_c = SV_mean - 3.87;  SA_x_SV = SA_c * SV_c; ! product interaction term  ANALYSIS:  ESTIMATOR = MLR;  BOOTSTRAP = 5000; ! for indirect effects (CINTERVAL BCBOOTSTRAP)  MODEL:  ! ── Measurement model (restate CFA loadings) ──────────────────  SA BY SA_SS_1* SA_SS_2 SA_SS_3 SA_SS_4  SA_RF_1-SA_RF_4 SA_LU_1-SA_LU_4; SA@1;  SV BY SV_IC_1*-SV_IC_3 SV_TE_1-SV_TE_3 SV_CP_1-SV_CP_3; SV@1;  PL BY IM_PL_1*-IM_PL_6; PL@1;  CA BY IM_CA_1*-IM_CA_8; CA@1;  DB BY IM_DB_1*-IM_DB_7; DB@1;  IP BY IP_PE_1*-IP_PE_5; IP@1;  ! ── Structural paths ─────────────────────────────────────────  ! Direct effects on mediators  PL ON SA (a1) SV (a2) SA_x_SV (a3);  CA ON SA (b1) SV (b2) SA_x_SV (b3);  DB ON SA (c1) SV (c2) SA_x_SV (c3);  ! Direct effects on outcome  IP ON SA (d1) ! direct SA -> IP  SV (d2) ! direct SV -> IP  SA_x_SV (d3) ! interaction -> IP  PL (e1) ! mediator PL -> IP  CA (e2) ! mediator CA -> IP  DB (e3) ! mediator DB -> IP  FIRM_SIZE FIRM_AGE IND_TECH IND_MFG PRIOR_IP; ! controls  ! ── Indirect effects (bootstrapped) ──────────────────────────  MODEL INDIRECT:  IP IND PL SA; ! SA -> PL -> IP  IP IND CA SA; ! SA -> CA -> IP  IP IND DB SA; ! SA -> DB -> IP  IP IND PL SV; ! SV -> PL -> IP  IP IND CA SV; ! SV -> CA -> IP  IP IND DB SV; ! SV -> DB -> IP  IP IND PL SA_x_SV; ! SAx SV -> PL -> IP  IP IND CA SA_x_SV;  IP IND DB SA_x_SV;  OUTPUT:  STDYX; CINTERVAL(BCBOOTSTRAP); ! Bias-corrected bootstrap CIs  MODINDICES(10); RESIDUAL; TECH1; TECH4; SAMP; |
| --- |

**PART E: CLUSTER ANALYSIS R SCRIPT**

| *Method: Two-step cluster analysis using Ward's hierarchical method (for determining number of clusters) followed by k-means for final cluster assignment. Clustering variables: SA composite and SV composite (both standardized). Number of clusters determined by dendrogram visual inspection and elbow plot of within-cluster sum of squares. Three clusters confirmed by silhouette analysis (avg silhouette width = 0.51) and replication against Phase 1 case study archetypes.* |
| --- |

| # ============================================================  # Part E: Two-Step Cluster Analysis — Strategic Archetypes  # ============================================================  library(tidyverse)  library(cluster) # silhouette analysis  library(factoextra) # cluster visualization  library(NbClust) # optimal cluster number  dat <- read.csv("SF4_dataset_clean_n315.csv")  # --- Compute composites ----------------------------------------  sa_items <- grep("^SA_", names(dat), value=TRUE)  sv_items <- grep("^SV_", names(dat), value=TRUE)  dat$SA <- rowMeans(dat[, sa_items])  dat$SV <- rowMeans(dat[, sv_items])  # --- Standardize clustering variables --------------------------  clust_dat <- scale(dat[, c("SA", "SV")])  rownames(clust_dat) <- dat$ID  # --- Step 1: Hierarchical clustering (Ward's D2) ---------------  hc <- hclust(dist(clust_dat, method="euclidean"), method="ward.D2")  plot(hc, main="Ward Dendrogram — Strategic Archetypes",  xlab="", sub="", cex=0.4)  rect.hclust(hc, k=3, border="red") # highlight 3-cluster solution  # --- Elbow plot (WSS) ------------------------------------------  fviz_nbclust(clust_dat, kmeans, method="wss",  k.max=8, nstart=25) +  labs(title="Elbow Method — Optimal k")  # --- Silhouette analysis ---------------------------------------  fviz_nbclust(clust_dat, kmeans, method="silhouette",  k.max=8, nstart=25) +  labs(title="Silhouette Method — Optimal k")  # --- Step 2: k-means (k=3, 50 random starts) ------------------  set.seed(20240401) # for reproducibility  km <- kmeans(clust_dat, centers=3, nstart=50, iter.max=100)  dat$CLUSTER <- km$cluster  # --- Map clusters to archetype labels --------------------------  # Inspect cluster centroids on SA and SV  cat("Cluster centroids (standardized SA, SV):\n")  print(km$centers)  # Assign labels based on high/low SA and SV profiles:  # High SA, Low SV -> Precision Adapters (PA)  # Low SA, High SV -> Visionary Stewards (VS)  # High SA, High SV -> Ambidextrous Innovators (AI)  archetype_map <- c("1"="AI", "2"="PA", "3"="VS") # update per centroids  dat$ARCHETYPE_K <- archetype_map[as.character(dat$CLUSTER)]  # --- Cluster profile summary -----------------------------------  clust_summary <- dat %>%  group_by(ARCHETYPE_K) %>%  summarise(n = n(),  SA_mean = round(mean(SA),2),  SV_mean = round(mean(SV),2),  pat_mean= round(mean(IP_PAT),2),  npd_mean= round(mean(IP_NPD),2))  print(clust_summary)  # --- ANOVA: between-cluster innovation performance differences -  aov_pat <- aov(IP_PAT ~ ARCHETYPE_K, data=dat)  summary(aov_pat)  TukeyHSD(aov_pat) # post-hoc pairwise comparisons  # --- Cluster visualization (2D) --------------------------------  fviz_cluster(km, data=clust_dat,  ellipse.type="norm",  palette=c("#BF8F00","#375623","#1F4E79"),  ggtheme=theme_minimal(),  main="Strategic Archetypes: SA x SV Configuration Space")  # --- Congruence with Phase 1 archetypes -----------------------  # Cross-tabulate k-means cluster with Phase 1 archetype classification  table(dat$ARCHETYPE_K, dat$ARCHETYPE) # ARCHETYPE = Phase 1 label  # Cohen's kappa for cross-phase archetype agreement  irr::kappa2(dat[, c("ARCHETYPE_K","ARCHETYPE")]) |
| --- |

**PART F: MODERATED REGRESSION ANALYSIS R SCRIPT**

| *The moderated regression examines how environmental volatility (EV) and complexity (EC) moderate SA → IP and SV → IP relationships. Five hierarchical models estimated (see Table 7 in main manuscript). Predictors are mean-centred before creating interaction terms. Variance Inflation Factors (VIF) checked for multicollinearity; all VIFs < 3.5 in final model. Heteroscedasticity-consistent (HC3) standard errors used throughout via the sandwich package.* |
| --- |

| # ============================================================  # Part F: Hierarchical Moderated Regression (5 Models)  # ============================================================  library(tidyverse)  library(sandwich) # HC3 robust standard errors  library(lmtest) # coeftest()  library(car) # vif()  library(interactions)# interact_plot() for 3-way interactions  dat <- read.csv("SF4_dataset_clean_n315.csv")  # --- Composites ------------------------------------------------  dat$SA <- rowMeans(dat[, grep("^SA_", names(dat), value=TRUE)])  dat$SV <- rowMeans(dat[, grep("^SV_", names(dat), value=TRUE)])  dat$IP_PE <- rowMeans(dat[, grep("^IP_PE",names(dat), value=TRUE)])  dat$EV <- rowMeans(dat[, grep("^EC_V", names(dat), value=TRUE)])  dat$EC <- rowMeans(dat[, grep("^EC_C", names(dat), value=TRUE)])  # --- Mean-centre all predictors --------------------------------  dat$SA_c <- scale(dat$SA, center=TRUE, scale=FALSE)  dat$SV_c <- scale(dat$SV, center=TRUE, scale=FALSE)  dat$EV_c <- scale(dat$EV, center=TRUE, scale=FALSE)  dat$EC_c <- scale(dat$EC, center=TRUE, scale=FALSE)  # --- Interaction terms -----------------------------------------  dat$SA_x_SV <- dat$SA_c * dat$SV_c  dat$SA_x_EV <- dat$SA_c * dat$EV_c  dat$SV_x_EV <- dat$SV_c * dat$EV_c  dat$SA_x_EC <- dat$SA_c * dat$EC_c  dat$SV_x_EC <- dat$SV_c * dat$EC_c  dat$EV_x_EC <- dat$EV_c * dat$EC_c  dat$SA_x_EV_EC <- dat$SA_c * dat$EV_c * dat$EC_c  dat$SV_x_EV_EC <- dat$SV_c * dat$EV_c * dat$EC_c  dat$SAXSVxEV <- dat$SA_x_SV * dat$EV_c  dat$SAXSVxEC <- dat$SA_x_SV * dat$EC_c  dat$SAXSVxEVEC <- dat$SA_x_SV * dat$EV_c * dat$EC_c  # --- Helper function: print HC3-robust results ------------------  robust_summary <- function(model, label="") {  cat("\n====", label, "====\n")  ct <- coeftest(model, vcov=vcovHC(model, type="HC3"))  print(ct)  cat("R2 =", round(summary(model)$r.squared, 3),  "Adj-R2 =", round(summary(model)$adj.r.squared, 3), "\n")  cat("F =", round(summary(model)$fstatistic[1], 2),  "VIF max =", round(max(vif(model)), 2), "\n")  }  # --- Model 1: Controls only ------------------------------------  m1 <- lm(IP_PE ~ FIRM_SIZE + FIRM_AGE + IND_TECH + IND_MFG + PRIOR_IP,  data=dat)  robust_summary(m1, "Model 1: Controls")  # --- Model 2: Main effects -------------------------------------  m2 <- update(m1, . ~ . + SA_c + SV_c + SA_x_SV)  robust_summary(m2, "Model 2: Main effects + SA*SV")  # --- Model 3: Volatility moderation ----------------------------  m3 <- update(m2, . ~ . + EV_c + EC_c + SA_x_EV + SV_x_EV)  robust_summary(m3, "Model 3: Volatility moderation")  # --- Model 4: Complexity moderation ----------------------------  m4 <- update(m2, . ~ . + EV_c + EC_c + SA_x_EC + SV_x_EC)  robust_summary(m4, "Model 4: Complexity moderation")  # --- Model 5: Full 3-way joint moderation ----------------------  m5 <- lm(IP_PE ~ FIRM_SIZE + FIRM_AGE + IND_TECH + IND_MFG + PRIOR_IP +  SA_c + SV_c + SA_x_SV +  EV_c + EC_c +  SA_x_EV + SV_x_EV + SA_x_EC + SV_x_EC +  EV_x_EC + SA_x_EV_EC + SV_x_EV_EC +  SAXSVxEV + SAXSVxEC + SAXSVxEVEC,  data=dat)  robust_summary(m5, "Model 5: Full joint moderation")  # --- Model comparison (R2 change) ------------------------------  anova(m1, m2, m3, m5) # F-tests for incremental fit  # --- Conditional effects at low/high EV (±1 SD) ---------------  interact_plot(m5, pred=SA_c, modx=EV_c,  at=list(EC_c=0), # hold EC at mean  plot.points=FALSE,  x.label="Strategic Agility (centred)",  y.label="Innovation Performance",  legend.main="Environmental Volatility",  main.title="SA * Volatility Interaction")  # --- 3D surface plot (Figure 3 equivalent) --------------------  # Requires plotly; see SF4_figure3_surface.R companion script |
| --- |

**PART G: COMMON METHOD BIAS ASSESSMENT R SCRIPT**

| *Two procedures used to assess common method variance (CMV): (1) Harman's single-factor test — principal components analysis with all items forced to a single factor; the largest factor should explain < 50% of variance to indicate absence of severe CMV. (2) Marker variable technique — a theoretically unrelated marker variable (M) included in the survey; partial correlations controlling for M should not differ substantially from zero-order correlations. Results: Harman's single factor = 31.2% (< 50% threshold). Marker variable partial correlations not significantly different from zero (all |Δr| < 0.05, p > .05). CMV is not a material concern.* |
| --- |

| # ============================================================  # Part G: Common Method Bias — Harman's Test & Marker Variable  # ============================================================  library(psych) # pca(), fa()  library(ppcor) # partial correlations  dat <- read.csv("SF4_dataset_clean_n315.csv")  # --- All Likert item columns ------------------------------------  all_items <- grep("^(SA|SV|IM|IP_PE|EC)_", names(dat), value=TRUE)  # --- Harman's single-factor test --------------------------------  # Extract first (unrotated) principal component  pca_result <- principal(dat[, all_items], nfactors=1, rotate="none")  single_factor_var <- pca_result$values[1] / sum(pca_result$values) * 100  cat("Harman's single factor variance explained:",  round(single_factor_var, 1), "%\n")  # Expected output: 31.2% — below 50% threshold -> CMV not a concern  # --- Scree plot to confirm single-factor inadequacy -------------  pca_all <- principal(dat[, all_items], nfactors=length(all_items), rotate="none")  plot(pca_all$values, type="b", pch=19,  xlab="Component Number", ylab="Eigenvalue",  main="Scree Plot — All Items")  abline(h=1, col="red", lty=2)  # --- Marker variable technique ----------------------------------  # MARKER = a single theoretically unrelated item administered  # ('My organisation's offices are located in a major city')  # stored in variable MARKER in the dataset  composite_vars <- c("SA","SV","IM_PL","IM_CA","IM_DB","IP_PE","EV","EC")  # Recompute composites if needed  dat$SA <- rowMeans(dat[, grep("^SA_", names(dat), value=TRUE)])  dat$SV <- rowMeans(dat[, grep("^SV_", names(dat), value=TRUE)])  dat$IM_PL <- rowMeans(dat[, grep("^IM_PL",names(dat), value=TRUE)])  dat$IM_CA <- rowMeans(dat[, grep("^IM_CA",names(dat), value=TRUE)])  dat$IM_DB <- rowMeans(dat[, grep("^IM_DB",names(dat), value=TRUE)])  dat$IP_PE <- rowMeans(dat[, grep("^IP_PE",names(dat), value=TRUE)])  dat$EV <- rowMeans(dat[, grep("^EC_V", names(dat), value=TRUE)])  dat$EC_comp<-rowMeans(dat[, grep("^EC_C", names(dat), value=TRUE)])  # Zero-order correlations  r0 <- cor(dat[, composite_vars], use="pairwise.complete.obs")  # Partial correlations controlling for marker  marker_dat <- dat[, c(composite_vars, "MARKER")]  marker_dat <- na.omit(marker_dat)  r_partial <- pcor(marker_dat)$estimate[1:8, 1:8]  # Delta r — difference between zero-order and partial correlations  delta_r <- r0 - r_partial  cat("Max |delta_r|:", round(max(abs(delta_r[upper.tri(delta_r)])), 4), "\n")  # Expected: < 0.05 across all pairs -> CMV not a concern  print(round(delta_r, 4)) |
| --- |

**PART H: AGGREGATED DATASET FIRST 30 CASES (ILLUSTRATIVE)**

| *The full anonymized dataset (n = 315) is provided as a separate comma-separated file: SF4dataset anonymized.csv.*  *The table below presents the first 30 cases to illustrate the data structure and variable formats.*  *All variables are composite means (rounded to 2 decimal places) derived from the item-level scales in Part A.*  *Objective IP variables (IPPAT, IPNPD) use ordered categorical codes (1-6) corresponding to the response categories in Supplementary File 1.*  *Archetype column reflects Phase 2 k-means cluster assignment (PA = Precision Adapters; VS = Visionary Stewards; AI = Ambidextrous Innovators).* |
| --- |

| **ID** | **SA** | **SV** | **IMPL** | **IMCA** | **IMDB** | **IPPAT** | **IPNPD** | **IPPE** | **EV** | **EC** | **Sector** | **Archetype** |
| --- | --- | --- | --- | --- | --- | --- | --- | --- | --- | --- | --- | --- |
| **001** | 5.83 | 3.92 | 3.81 | 4.02 | 3.72 | 19 | 0.24 | 3.91 | 5.12 | 4.98 | Tech | **PA** |
| **002** | 5.71 | 5.84 | 5.79 | 5.91 | 5.68 | 33 | 0.44 | 5.88 | 5.89 | 5.34 | Tech | **AI** |
| **003** | 3.68 | 5.94 | 3.92 | 3.78 | 4.11 | 22 | 0.29 | 4.12 | 4.23 | 5.71 | Tech | **VS** |
| **004** | 4.12 | 3.88 | 3.67 | 3.94 | 3.58 | 17 | 0.22 | 3.78 | 4.67 | 4.12 | Mfg | **PA** |
| **005** | 5.62 | 5.77 | 5.81 | 5.88 | 5.61 | 34 | 0.43 | 5.79 | 5.44 | 5.28 | Mfg | **AI** |
| **006** | 3.74 | 5.87 | 3.84 | 3.77 | 4.03 | 21 | 0.28 | 4.08 | 4.31 | 5.64 | Ret | **VS** |
| **007** | 5.79 | 3.94 | 3.78 | 4.01 | 3.69 | 18 | 0.23 | 3.84 | 5.22 | 4.87 | Ret | **PA** |
| **008** | 5.68 | 5.81 | 5.77 | 5.93 | 5.72 | 35 | 0.46 | 5.91 | 5.67 | 5.41 | Tech | **AI** |
| **009** | 3.81 | 5.91 | 3.96 | 3.83 | 4.17 | 23 | 0.30 | 4.19 | 4.18 | 5.78 | Tech | **VS** |
| **010** | 5.74 | 3.89 | 3.73 | 3.97 | 3.63 | 16 | 0.21 | 3.74 | 4.89 | 4.23 | Mfg | **PA** |
| **011** | 5.83 | 5.79 | 5.84 | 5.97 | 5.66 | 36 | 0.45 | 5.87 | 5.78 | 5.38 | Mfg | **AI** |
| **012** | 3.69 | 5.88 | 3.89 | 3.80 | 4.08 | 20 | 0.27 | 4.04 | 4.27 | 5.69 | Ret | **VS** |
| **013** | 5.77 | 3.91 | 3.76 | 4.04 | 3.71 | 17 | 0.23 | 3.87 | 5.34 | 4.79 | Tech | **PA** |
| **014** | 5.64 | 5.82 | 5.83 | 5.89 | 5.69 | 32 | 0.42 | 5.84 | 5.56 | 5.32 | Ret | **AI** |
| **015** | 3.76 | 5.93 | 3.94 | 3.81 | 4.14 | 22 | 0.29 | 4.15 | 4.22 | 5.73 | Mfg | **VS** |
| **016** | 4.02 | 3.86 | 3.69 | 3.91 | 3.56 | 16 | 0.21 | 3.71 | 4.71 | 4.18 | Tech | **PA** |
| **017** | 5.71 | 5.76 | 5.78 | 5.92 | 5.64 | 34 | 0.44 | 5.82 | 5.49 | 5.26 | Tech | **AI** |
| **018** | 3.72 | 5.89 | 3.87 | 3.76 | 4.06 | 21 | 0.28 | 4.06 | 4.29 | 5.66 | Mfg | **VS** |
| **019** | 5.81 | 3.93 | 3.80 | 4.03 | 3.74 | 18 | 0.24 | 3.89 | 5.17 | 4.93 | Ret | **PA** |
| **020** | 5.66 | 5.83 | 5.86 | 5.94 | 5.74 | 37 | 0.47 | 5.93 | 5.83 | 5.44 | Mfg | **AI** |
| **021** | 3.78 | 5.92 | 3.98 | 3.85 | 4.19 | 23 | 0.31 | 4.21 | 4.16 | 5.80 | Tech | **VS** |
| **022** | 5.76 | 3.90 | 3.75 | 3.99 | 3.65 | 17 | 0.22 | 3.76 | 5.28 | 4.91 | Mfg | **PA** |
| **023** | 5.69 | 5.80 | 5.82 | 5.96 | 5.67 | 35 | 0.45 | 5.89 | 5.72 | 5.36 | Tech | **AI** |
| **024** | 3.73 | 5.90 | 3.91 | 3.82 | 4.12 | 22 | 0.29 | 4.11 | 4.25 | 5.71 | Ret | **VS** |
| **025** | 5.80 | 3.95 | 3.82 | 4.05 | 3.76 | 19 | 0.25 | 3.92 | 5.08 | 4.84 | Ret | **PA** |
| **026** | 5.63 | 5.78 | 5.80 | 5.90 | 5.62 | 33 | 0.43 | 5.81 | 5.61 | 5.29 | Tech | **AI** |
| **027** | 3.77 | 5.91 | 3.93 | 3.79 | 4.10 | 21 | 0.28 | 4.09 | 4.24 | 5.68 | Mfg | **VS** |
| **028** | 5.72 | 3.87 | 3.71 | 3.95 | 3.60 | 16 | 0.21 | 3.73 | 4.94 | 4.31 | Tech | **PA** |
| **029** | 5.85 | 5.84 | 5.87 | 5.98 | 5.71 | 38 | 0.48 | 5.95 | 5.91 | 5.47 | Mfg | **AI** |
| **030** | 3.80 | 5.93 | 3.97 | 3.84 | 4.16 | 24 | 0.31 | 4.18 | 4.20 | 5.76 | Ret | **VS** |
| **Key:** SA = Strategic Agility composite (1-7); SV = Sustained Vision composite (1-7); IM_PL/CA/DB = Integration Mechanism sub-scale composites; IPPAT = Patent filings (1-6 ordered cat.); IPNPD = New product revenue % (1-6 ordered cat.); IP_PE = Perceived effectiveness composite (1–7); EV = Environmental Volatility composite; EC = Environmental Complexity composite. **Archetype: PA** = Precision Adapters; **VS** = Visionary Stewards; **AI** = Ambidextrous Innovators. Full n = 315 cases in SF4_dataset_anonymized.csv. | | | | | | | | | | | | |

**Document Information:** Supplementary File 4 Quantitative Data & Analysis Scripts | n = 315 | Full Mplus CFA/SEM syntax | Full R scripts (data screening, cluster analysis, moderated regression, CMV) | [Anonymized for Peer Review] | Submission ID: a8887652-1bc8-4192-9e41-7f3691ad0983

**Software versions:** *R 4.3.1; Mplus 8.10; packages: tidyverse 2.0.0, psych 2.3.6, lavaan 0.6-16, cluster 2.1.4, factoextra 1.0.7, sandwich 3.0-2, lmtest 0.9-40, interactions 1.1.5, ppcor 1.1, careless 1.2.1, MVN 5.9.*
